1 Bayesian hierarchical GAM to model BBS data

2 *RESEARCH ARTICLE*

3 **North American Breeding Bird Survey status and trend estimates to inform a wide-range**  
4 **of conservation needs, using a flexible Bayesian hierarchical generalized additive model**

5

6 Adam C. Smith<sup>1\*</sup> and Brandon P.M. Edwards<sup>2</sup>

7 <sup>1</sup>Canadian Wildlife Service, Environment Climate Change Canada, National Wildlife Research  
8 Centre, Ottawa Canada K1A 0H3.

9 ORCID: 0000-0002-2829-4843

10 <sup>2</sup>Department of Mathematics & Statistics, University of Guelph, Guelph Canada.

11 ORCID: 0000-0003-0865-3076

12 \* Corresponding author: adam.smith2@canada.ca

### 13 **ACKNOWLEDGEMENTS**

14 We sincerely thank the thousands of U.S. and Canadian participants who annually perform and  
15 coordinate the North American Breeding Bird Survey. We also wish to acknowledge Courtney  
16 Amundson for sharing some code on similar models, and John Sauer and Bill Link for sharing  
17 code that helped with the cross-validations and for many spirited, collegial discussions that have  
18 informed this work. We also thank the many biologists within the Canadian Wildlife Service and  
19 other users of the BBS status and trend estimates whose insightful questions and suggestions

20 motivated much of this work, including Charles Francis, Marie-Anne Hudson, Veronica Aponte,  
21 Marcel Gahbauer, Pete Blancher, and Ken Rosenberg.

22 **Data Depository:** R scripts to download the BBS data and to perform the analyses in this paper  
23 and are archived at [www.github.com/AdamCSmithCWS/GAM\\_Paper\\_Script](https://www.github.com/AdamCSmithCWS/GAM_Paper_Script)

24 **Funding Statement:** This work was supported by operating funds from Environment and  
25 Climate Change Canada

26 **Ethics Statement:** This research was conducted in compliance with the Environment and  
27 Climate Change Canada Values and Ethics Code.

28 **Author Contributions:** ACS conceived the ideas and designed methodology; BPME and ACS  
29 analyzed the data; ACS led the writing of the manuscript. ACS and BPME contributed critically  
30 to the drafts and gave final approval for publication.

31

32 **ABSTRACT**

33 The status and trend estimates derived from the North American Breeding Bird Survey (BBS),  
34 are critical sources of information for bird conservation. However, the estimates are partly  
35 dependent on the statistical model used. Therefore, multiple models are useful because not all of  
36 the varied uses of these estimates (e.g. inferences about long-term change, annual fluctuations,  
37 population cycles, recovery of once declining populations) are supported equally well by a single  
38 statistical model. Here we describe Bayesian hierarchical generalized additive models (GAM) for  
39 the BBS, which share information on the pattern of population change across a species' range.  
40 We demonstrate the models and their benefits using data a selection of species; and we run a full  
41 cross-validation of the GAMs against two other models to compare predictive fit. The GAMs  
42 have better predictive fit than the standard model for all species studied here, and comparable  
43 predictive fit to an alternative first difference model. In addition, one version of the GAM  
44 described here (GAMYE) estimates a population trajectory that can be decomposed into a  
45 smooth component and the annual fluctuations around that smooth. This decomposition allows  
46 trend estimates based only on the smooth component, which are more stable between years and  
47 are therefore particularly useful for trend-based status assessments, such as those by the IUCN. It  
48 also allows for the easy customization of the model to incorporate covariates that influence the  
49 smooth component separately from those that influence annual fluctuations (e.g., climate cycles  
50 vs annual precipitation). For these reasons and more, this GAMYE model is a particularly useful  
51 model for the BBS-based status and trend estimates.

52 *Keywords:* Bayesian, Breeding bird survey, Cross validation, Generalized additive model,  
53 Population change, Status and trend estimates

## 54 LAY SUMMARY

- 55 • The status and trend estimates derived from the North American Breeding Bird Survey  
56 are critical sources of information for bird conservation, but they are partly dependent on  
57 the statistical model used.
- 58 • We describe a model to estimate population status and trends from the North American  
59 Breeding Bird Survey data, using a Bayesian hierarchical generalized additive mixed-  
60 model that allows for flexible population trajectories and shares information on  
61 population change across a species' range.
- 62 • The model generates estimates that are broadly useful for a wide range of common  
63 conservation applications, such as IUCN status assessments based on trends or changes in  
64 the rates of decline for species of concern; and the estimates have better or similar  
65 predictive accuracy to other models., and

## 66 INTRODUCTION

67 Estimates of population change derived from the North American Breeding Bird Survey are a  
68 keystone of avian conservation in North America. Using these data, the Canadian Wildlife  
69 Service (CWS, a branch of Environment and Climate Change Canada) and the United States  
70 Geological Survey (USGS) produce national and regional status and trend estimates (estimates of  
71 annual relative abundance and rates of change in abundance, respectively) for 300-500 species of  
72 birds (Smith et al. 2019, Sauer et al. 2014). These estimates are derived from models designed to  
73 account for some of the sampling imperfections inherent to an international, long-term field  
74 survey, such as which sites or routes are surveyed in a given year and variability among  
75 observers (Sauer and Link 2011, Smith et al. 2014). Producing these estimates requires  
76 significant analytical expertise, time, and computing resources, but they are used by many

77 conservation organizations and researchers to visualize, analyze, and assess the population status  
78 of many North American bird species (e.g., Rosenberg et al. 2017, NABCI Canada 2019,  
79 Rosenberg et al. 2019).

80 While the estimates of status and trend from the BBS serve many different purposes, not all uses  
81 are equally well supported by the standard models, and so there is a need for alternative models  
82 and for a continual evolution of the modeling. Different conservation-based uses of the BBS  
83 status and trend estimates relate to different aspects of population change, including long-term  
84 trends for overall status (Partners in Flight, 2019), short-term trends to assess extinction-risk  
85 (IUCN 2019), changes in population trends to assess species recovery (Environment Climate  
86 Change Canada, 2016), or annual fluctuations (Wilson et al., 2018). Each one of these uses relies  
87 on different parameters, or spatial and temporal variations in those parameters, and no single  
88 model can estimate all parameters equally well. This is not a criticism; it is true of any single  
89 model. For example, the standard model used between 2011 and 2017 in the United States and  
90 2011 and 2016 in Canada, is essentially a Poisson regression model, which estimates population  
91 change using random year-effects around a continuous slope in a Bayesian hierarchical  
92 framework (Sauer and Link 2011, Smith et al. 2014). These slope and year-effects are well suited  
93 to estimating annual fluctuations around a continuous long-term change, but the model tends to  
94 be conservative when it comes to estimating changes in a species' population trend (e.g.,  
95 population recovery after decline), or population cycles (Fewster et al. 2000, Smith et al. 2015).  
96 Similarly, short-term trends (e.g., the last 10-years of the time-series) derived from this standard  
97 model incorporate information from the entire time-series (i.e., the slope component of the  
98 model). For many purposes, this is a reasonable and useful assumption, which guards against  
99 extreme and imprecise fluctuations in short-term trends. However, for assessing changes in

100 trends of a once-declining species, such as the recovery of a species at risk (Environment and  
101 Climate Change Canada, 2016), this feature of the model is problematic.

102 Generalized Additive Models (GAM, Wood 2017) provide a flexible framework for tracking  
103 changes in populations over time, without any assumptions about a particular temporal pattern in  
104 population change (Fewster et al., 2000, Knappe 2016). The semi-parametric smooths can fit  
105 almost any shape of population trajectory, including stable populations, constant rates of increase  
106 or decrease, cycles of varying frequency and amplitude, or change points in population trends  
107 (Wood 2017). Furthermore, the addition of new data in subsequent years has relatively little  
108 influence on estimates of population change in the earlier portions of the time-series. By contrast,  
109 the slope parameter in the standard models effectively assumes that there is some consistent rate  
110 of change. As a result, to the extent that the slope parameter influences the estimated trajectory,  
111 estimates of the rate of a species population change in the early portion of the time series (e.g.,  
112 during the 1970s or 80s) can change in response to the addition of contemporary data and recent  
113 rates of population change.

114 GAMs also provide a useful framework for sharing information on the shape and rate of  
115 population change across a species' range. The GAM smoothing parameters can be estimated as  
116 random effects within geographic strata, thus allowing the model to share information on the  
117 shape of the population trajectory across a species range. In the terminology of Pedersen et al.  
118 2019, this hierarchical structure on the GAM parameters would make our model a "HGAM"  
119 (Hierarchical Generalized Additive Model). However, it also includes random effects for  
120 parameters not included in the smooth and could therefore be referred to as a GAMM  
121 (Generalized Additive Mixed Model), in the terminology of Wood 2017. Similarly in the  
122 standard model, the slope parameters can be estimated as random effects and share information

123 among strata, which improves estimates of trend for relatively data-sparse regions (Link et al.  
124 2017, Smith et al. 2019). Although recent work has shown that the standard model is, for many  
125 species, out-performed by a first-difference model (Link et al. 2020), the population change  
126 components of the first-difference model (Link et al. 2017), include no way to share information  
127 on population change in space and so population trajectories are estimated independently among  
128 strata. Of course, for some conservation uses, this independent estimation of population  
129 trajectories might be critical (e.g., if one were interested specifically in estimating the differences  
130 in trends among provinces or states), and in these situations the sharing of information could be  
131 problematic.

132 Trend estimates (interval-specific rates of mean annual population change, Sauer and Link 2011,  
133 Link et al. 2020) derived from the inherently smooth temporal patterns generated by GAMs are  
134 well suited to particularly common conservation uses, such as assessments of trends in  
135 populations from any portion of a time-series, as well as assessments of the change in the trends  
136 over time. For example, the population trend criteria of the IUCN (IUCN 2019) or Canada's  
137 national assessments by the Committee on the Status of Endangered Wildlife in Canada  
138 (COSEWIC) are based on rates of change over 3 generations. For most bird species monitored  
139 by the BBS, this 3-generation time is approximately the same as the 10-year, short-term trends  
140 produced by the CWS and USGS analyses. Because of the inclusion of year-effects in the  
141 standard model, these short-term trends fluctuate from year to year, complicating the quantitative  
142 assessment of a species trend in comparison to the thresholds. Species trends may surpass the  
143 threshold in one year, but not in the next. The same end-point comparisons on estimates from a  
144 GAM will change much more gradually over time, and be much less dependent on the particular  
145 year in which a species is assessed.

146 In this paper, we describe a status and trend model that uses a hierarchical GAM to estimate the  
147 relative abundance trajectory of bird populations, using data from the BBS. This model allows  
148 for the sharing of information about a species' population trajectory among geographic strata and  
149 for the decomposition of long- and medium-term population changes from annual fluctuations.  
150 We also compare the fit of the GAM, and a GAM-version that includes random year-effects  
151 (conceptually similar to Knappe et al. 2016), to the fit of two alternative models for the BBS  
152 (Sauer and Link 2011, Smith et al. 2015, Link et al. 2020).

## 153 **METHODS**

### 154 **Overview**

155 We designed a Bayesian hierarchical model for estimating status and trends from the  
156 North American Breeding Bird Survey (BBS) that uses a Generalized Additive Model (GAM)  
157 smooth to estimate the medium- and long-term temporal components of a species population  
158 trajectory (i.e., changes occurring over time-periods ranging from 3-53 years). In the model, the  
159 parameters of the GAM smooths are treated as random-effects within the geographic strata (the  
160 spatial units of the predictions, intersections of Bird Conservation Regions and  
161 province/state/territory boundaries), so that information is shared on the shape of the population  
162 trajectory across the species' range. In comparison to the non-Bayesian hierarchical GAMs  
163 (HGAM) in Pedersen et al. 2019, our model is most similar to the "GS" model, which has a  
164 global smooth in addition to group-level smooths with a similar degree of flexibility. We applied  
165 two versions of the GAM: one in which the GAM smooth was the only component modeling  
166 changes in abundance over time (GAM), and another in which random year effects were also  
167 estimated to allow for single-year departures from the GAM smooth (GAMYE, which is  
168 conceptually similar to the model described in Knappe 2016).



169 For a selection of species, we compared estimates and predictive accuracy of our two models  
170 using the GAM smooth, against two alternative models that have been used to analyze the BBS  
171 data. We chose the main comparison species (Barn Swallow) because of the striking differences  
172 between trajectories from the SLOPE model and a number of non-linear models (Sauer and Link  
173 2017, Smith et al. 2015). We added a selection of other species to represent a range of  
174 anticipated patterns of population change, including species with known change points in their  
175 population trajectories (Chimney Swift, Smith et al. 2015), and species with relatively more data  
176 and known large and long-term trends (Wood Thrush, Ruby-throated Hummingbird) and species  
177 with relatively fewer data and long-term changes (Canada Warbler, Cooper's Hawk, and  
178 Chestnut-collared Longspur). Finally, we also added a few species with strong annual  
179 fluctuations and/or abrupt step-changes in abundance (Pine Siskin, Carolina Wren).

180 The BBS data are collected along roadside survey-routes that include 50 stops at which a 3-  
181 minute point count is conducted, once annually, during the peak of the breeding season (Robbins  
182 et al. 1986, Sauer et al. 2017, Hudson et al. 2017). All of the models here use the count of  
183 individual birds observed on each BBS route (summed across all 50 stops) in a given year by a  
184 particular observer. The four statistical models differed only in the parameters used to model  
185 changes in species relative abundance over time. We used 15-fold cross validation (Burman  
186 1983) to estimate the observation-level, out-of-sample predictive accuracy of all four models  
187 (Link et al. 2020, Vehtari et al. 2017). We chose this 15-fold cross-validation approach because  
188 although full leave-one-out (loo) cross-validation minimizes bias and variance of the estimate of  
189 predictive accuracy (Zhang and Yang 2015), the size of the BBS dataset makes this impractical  
190 (Link et al. 2017), and cross-validation with  $k > 10$  is a reasonable approximation of loo (Kohavi

191 1995, Vehtari et al. 2017). We compared the overall predictive accuracy among the models, and  
192 we explored the spatial and temporal variation in predictive accuracy in depth.

193 Using the cross-validation, we have compared four alternative BBS models, all of which have  
194 the same basic structure:

$$\log(\lambda_{s,j,t}) = \theta_s + \Delta_s(t) + \eta I[j, t] + \omega_j + \varepsilon_{s,j,t}$$

195 The models treat the observed BBS counts as overdispersed Poisson random variables, with  
196 mean  $\lambda_{s,j,t}$  (i.e., geographic stratum  $s$ , observer and route combination  $j$ , and year  $t$ ). The means  
197 are log-linear functions of stratum-specific intercepts ( $\theta_s$ , estimated as fixed effects and with the  
198 same priors following Smith et al. 2014), observer-route effects ( $\omega_j$ , estimated as random effects  
199 and with the same priors following Sauer and Link 2011), first-year startup effects for a  
200 observer ( $\eta$ , estimated as fixed effects and with the same priors following Sauer and Link 2011),  
201 a count-level random effect to model overdispersion ( $\varepsilon_{s,j,t}$ , estimated using heavy-tailed, t-  
202 distribution and with the same priors following Link et al. 2020), and a temporal component  
203 estimated using a function of year, which varies across the four models ( $\Delta_s(t)$ ). The models here  
204 only varied in their temporal components ( $\Delta_s(t)$ ).

205

## 206 **Bayesian hierarchical GAMs**

207 **GAM.** The main temporal component  $\Delta_s(t)$  in the GAM was modeled with a semi-parametric  
208 smooth, estimated following Crainiceanu et al (2005) as

$$\Delta_s^{\text{GAM}}(t) = \sum_{k=1}^K \beta_{s,k} \chi_{t,k}$$

209 where  $K$  is the number of knots,  $\chi_{t,k}$  is the year  $t$  and  $k$ th entry in the design matrix  $X$  (defined  
210 below), and  $\beta_{s,k}$  is the  $K$ -length vector of parameters that control the shape of the trajectory in  
211 stratum  $s$ . Each  $\beta_{s,k}$  is estimated as a random effect, centered on a mean across all strata (a  
212 hyperparameter  $B_k$ )

$$\beta_{s,k} \sim \text{Normal}(B_k, \sigma_\beta^2)$$

213 and

$$B_K \sim \text{Normal}(\mathbf{0}, \sigma_B^2)$$

214 where the variance  $\sigma_B^2$  acts as the complexity penalty, shrinking the complexity and the overall  
215 change of the mean trajectory towards a flat line). It would be possible to add an additional slope  
216 parameter, as was done in Crainiceanu et al. 2005, but we have found that the BBS data for most  
217 species are insufficient to allow for the separate estimation of the linear component to population  
218 change and the additive smooth. In addition, we see little benefit to including a linear component  
219 because the assumptions required to include a constant linear slope for a 53 year time-series are  
220 unlikely to be met for any continental-scale population. In combination, these variance  
221 parameters ( $\sigma_\beta^2, \sigma_B^2$ ) control the complexity penalty of the species trajectories and the variation in  
222 pattern and complexity among strata and were given the following priors, following advice in  
223 Crainiceanu et al (2005):

$$\sigma_\beta^2 \sim \frac{1}{\text{gamma}(2, 0.2)}$$

$$\sigma_B^2 \sim \frac{1}{\text{gamma}(10^{-2}, 10^{-4})}$$

224 These prior parameters were chosen to ensure that the priors are sufficiently vague that they are  
225 overwhelmed by the data, particularly for  $\sigma_B^2$  that controls the shape of the survey-wide trajectory  
226 (Crainiceanu et al 2005). We have so far had good results across a wide range of species using  
227 these priors, and in tests of alternative priors there is no effect on posterior estimates  
228 (Supplemental Figure S9). For example, estimates of  $B_K$  and  $\sigma_B$  for Chestnut-collared Longspur  
229 (a relatively data-poor species) are unchanged even if using a much more restrictive prior on  $\sigma_B$   
230 that places 99% of the prior density for  $\sigma_B$  below 1.2 ( $\sigma_B^2 \sim \frac{1}{\text{gamma}(2,0.2)}$ ). However, these  
231 variance priors are an area of ongoing research, aimed at improving the efficiency of the MCMC  
232 sampling.

233 The design matrix for the smoothing function ( $X$ ) has a row for each year, and a column for each  
234 of  $K$  knots. The GAM smooth represented a 3<sup>rd</sup>-degree polynomial spline:  $\chi_{t,k} = |t' - t'_k|^3$ ,  
235 and was calculated in R, following Crainiceanu et al (2005). We centered and re-scaled the year-  
236 values to improve convergence, so that  $t' = (t - \text{midyear})/T$ , where midyear is the middle  
237 year of the time-series, and  $T$  is the number of years in the time-series. Here, we have used 13  
238 knots ( $K = 13$ ), across the 53-year time-series of the BBS (1966-2018), which results in  
239 approximately one knot for every 4 years in the time-series. With this number of knots, we have  
240 found that the 53-year trajectories are sufficiently flexible to capture all but the shortest-term  
241 variation (i.e., variation on the scale of 3-53 years, but not annual fluctuations). Models with  
242 more knots are possible but in the case of a penalized smooth, the overall patterns in the  
243 trajectory will be very similar, as long as a sufficient number of knots is allowed (Wood 2017).  
244 The number of knots could be customized in a species-specific approach, however because we  
245 are looking for a general model structure that can be applied similarly across the >500 species in

246 the BBS, we have fixed the number of knots at 13. Our approach relies on the shrinkage of the  
247 smoothing parameters ( $B, \beta$ ) to ensure that the trajectories are only as complex as the data  
248 support, and the limited number of knots constrains the complexity of the additive function  
249 (Wood 2017, Fewster et al. 2000).

250 **GAMYE.** The GAMYE was identical to the GAM, with the addition of random year effects  
251 ( $\gamma_{t,s}$ ) estimated independently among strata, following Sauer and Link (2011) and Smith et al.  
252 (2015), as

$$\gamma_{t,s} \sim \text{Normal}(\mathbf{0}, \sigma_{\gamma,s}^2)$$

253 where  $\sigma_{\gamma,s}^2$  are stratum-specific variances. Thus, the temporal component for the GAMYE is  
254 given by

$$\Delta_s^{GAMYE}(t) = \sum_{k=1}^K \beta_{s,k} \chi_{t,k} + \gamma_{t,s}$$

255 The GAMYE trajectories are therefore an additive combination of the smooth and random  
256 annual fluctuations. The smooth components of the trajectory in the GAMYE are generally very  
257 similar to those from the GAM, but tend to be slightly less variable (i.e., less complex) because  
258 the year-effects components can account for single-year deviations from the longer-term patterns  
259 of population change. The full trajectories from the GAMYE (smooth plus the year-effects)  
260 generally follow the same overall pattern as the GAM estimates, and include abrupt single-year  
261 changes in abundance, which increases the capacity to model step-changes in abundance.

262 **Alternative models**

263 For a selection of species, we compared the predictions and predictive accuracy of the two  
264 GAMs against two alternative models previously used for the BBS.

265 **SLOPE.** The SLOPE model includes a slope parameter and random year-effects to model  
266 species trajectories. It is a linear year-effects model currently used by both the CWS (Smith et al.  
267 2014) and the USGS (Sauer et al. 2017) as an omnibus model to supply status and trend  
268 estimates from the BBS (essentially the same as model SH, the Slope model with Heavy-tailed  
269 error in Link et al 2017). The temporal component in the SLOPE model is

$$\Delta_s^{SLOPE}(t) = \beta_s * (t - t_{mid}) + \gamma_{t,s}$$

270 **DIFFERENCE.** The first-difference model (DIFFERENCE) is based on a model described in  
271 Link and Sauer (2015) and models the temporal component as

$$\Delta_s^{DIFFERENCE}(t) = \gamma_{t,s} = N(\gamma_{t-1,s}, \sigma_{\gamma_s}^2)$$

272 The DIFFERENCE model includes year-effects that follow a random walk prior from the first  
273 year of the time-series, by modeling the first-order differences between years as random effects  
274 with mean zero and an estimated variance.

275 All analyses in this paper were conducted in R (R Core Team, 2019), using JAGS to implement  
276 the Bayesian analyses (Plummer 2003), and an R-package *bbsBayes* (Edwards and Smith 2020)  
277 to access the BBS data and run all of the models used here. We used the same number of burn-in  
278 iterations (10 000), thinning-rate (1/10), chains (3), and number of saved samples from the  
279 posterior (3000) to estimate trends and trajectories for all models. We examined trace plots and  
280 the Rhat statistic to assess convergence. The graphs relied heavily on the package *ggplot2*

281 (Wickham 2016). BUGS-language descriptions of the GAM and GAMYE, as well as all the code  
282 and data used to produce the analyses in this study, are archived online (see Data Depository in  
283 Acknowledgements).

#### 284 **Cross-validation**

285 We used a temporally and spatially stratified v-fold cross-validation (Burman 1983, often termed  
286 “k-fold”, but here we use Berman’s original “v-fold” to distinguish it from “k” which is often  
287 used to describe the number of knots in a GAM) with  $v = 15$ , where we held-out random sets of  
288 counts, stratified across all years and strata so that each of the v-folds included some  
289 observations from almost every combination of strata and years. We did this by randomly  
290 allocating each count within a given stratum and year to one of the 15 folds. We chose this  
291 approach over a leave-one-out cross-validation (loo) approach using a random subset of counts  
292 (e.g., Link et al. 2017) because we wanted to assess the predictive success across all counts in the  
293 dataset, explore the temporal and spatial patterns in predictive success, and a full loo is not  
294 practical for computational reasons (see Link et al. 2017). We could also have chosen to conduct  
295 a structured cross-validation (Roberts et al. 2017), but cross-validation in a Bayesian context has  
296 particularly large computational requirements; there are multiple levels of dependencies in the  
297 BBS data (dependences in time, space, and across observers); and models being compared vary  
298 in the way they treat some of those dependencies (models that share information differently in  
299 space and/or time). Therefore, we chose a relatively simple non-structured approach where the  
300 folds are balanced in time and space, and for a given species were identical across all models  
301 compared. We followed a similar procedure to that outlined in Link et al. (2017) to implement  
302 the cross-validation in a parallel computing environment, using the R-package foreach  
303 (Microsoft and Weston 2019). We used the end-values from the model-run using the full dataset

304 as initial values in each of the 15 cross-validation runs, ran a short burn-in of 1000 samples, then  
305 used a draw of 3000 samples of the posterior with a thinning rate of 1/10 spread across 3 chains.  
306 We did not calculate WAIC because previous work has shown that WAIC does not approximate  
307 too well for the BBS data (Link et al. 2017, Link et al. 2020).

308 We used the estimated log predictive density ( $\text{elpd}_{i,M}$ ) to compare the observation-level, out-of-  
309 sample predictive success of all four models (Link et al. 2020, Vehtari et al. 2017). For a given  
310 model  $M$ ,  $\text{elpd}$  is the estimated log posterior density for each observation  $i$ , for the model  $M$  fit  
311 to all data except those in the set  $v$  that includes  $i$  ( $Y_{-v, i \in v}$ ). That is,

$$\text{elpd}_{i,M} = \log \left( f_M(Y_i | Y_{-v, i \in v}, X_i) \right)$$

312 Larger values of  $\text{elpd}$  indicate better predictive success, that is a higher probability of the  
313 observed data given the model  $M$ , the estimated parameters, the vector of covariates for  
314 observation  $i$ , such as the year, observer-route, etc. ( $X_i$ ), and all of the data used to fit the model  
315 ( $Y_{-v, i \in v}$ ).

316 We have not summed  $\text{elpd}$  values to generate BPIC values (Link et al. 2020); rather, we have  
317 compared model-based estimates of mean difference in  $\text{elpd}$  between pairs of models. We  
318 modeled the  $\text{elpd}$  values so that we could account for the imbalances in the BBS data in time and  
319 space (i.e., the variation in number of counts among strata and years). The raw sum of the  $\text{elpd}$   
320 values would give greater weight to the regions with more data and to the recent years in the  
321 time-series, which have more counts. Therefore, expanding on the approach in Link et al. 2020  
322 that used a z-score to estimate the significance of the difference in fit between two models, we  
323 used a hierarchical model to estimate the mean difference in predictive fit ( $\delta_i^{\text{elpd}}$ ). We first



324 calculated the difference in the elpd of each observed count ( $Y_i$ ) under models 1 and 2, as

325  $\delta_{i,M1-M2}^{elpd} = \log(f_1(Y_i|Y_{-v,i \in v}, X_i)) - \log(f_2(Y_i|Y_{-v,i \in v}, X_i))$ , so that positive values of  $\delta_{i,M1-M2}^{elpd}$

326 indicate more support for model 1. We then analysed these  $\delta_i^{elpd}$  values using an additional

327 Bayesian hierarchical model, with random effects for year and strata to account for the variation

328 in sampling effort in time and space. These random effects account for the imbalances in the

329 BBS-data among years and regions, and the inherent uncertainty associated with any cross-

330 validation statistic (Vehtari et al. 2017, and Link et al. 2017). This model treated the elpd

331 differences for a count from a given year  $t$  and stratum  $s$  ( $\delta_{i,s,t}^{elpd}$ ) as having a t-distribution with

332 an estimated variance ( $\sigma_\delta^2$ ) and degrees of freedom ( $\nu$ ). That is,

$$\delta_{i,s,t}^{elpd} = t(\mu_i, \sigma_\Delta^2, \nu)$$

$$\mu_i = \phi + \psi_s + \psi_t$$

333 From the model,  $\phi$  was our estimate of the overall comparison of the mean difference in

334 predictive fit for Model 1 – Model 2 ( $\delta_{M1-M2}^{elpd} = \phi$ ),  $\phi + \psi_s$  was the estimate of the mean

335 difference in stratum  $s$ , and  $\phi + \psi_t$  was the estimated difference in year  $t$ . The year and stratum

336 effects ( $\psi_s + \psi_t$ ) were estimated as random effects with a mean of zero and estimated variances

337 given uninformative inverse gamma priors. We used this t-distribution as a robust estimation

338 approach, instead of the z-score approach used by Link et al. (2020) because of the extremely

339 heavy tails in the distribution of the  $\delta_i^{elpd}$  values (Supplemental Figure S7). Given these heavy

340 tails, a statistical analysis assuming a normal distribution in the differences would give an

341 inappropriately large weight to a few counts where the prediction differences were extremely

342 large in magnitude (Gelman et al. 2014). In essence, our model is simply a “robust” version of

343 the z-score approach (Lange et al. 1989) with the added hierarchical parameters to account for  
344 the spatial and temporal imbalance in the BBS data.

345

### 346 **Trends and population trajectories**

347 For all models, we used the same definition of trend following Sauer and Link (2011) and Smith  
348 et al. (2015); that is, an interval-specific geometric mean of proportional changes in population  
349 size, expressed as a percentage. Thus, the trend estimate for the interval from year a ( $t_a$ ) through  
350 year b ( $t_b$ ) is given by

$$R_{a,b} = 100 * \left( \left( \frac{N_{t_a}}{N_{t_b}} \right)^{\frac{1}{t_a - t_b}} - 1 \right)$$

351 where  $N_t$  represents the annual index of abundance in a given year (see below). Because this  
352 estimate of trend only considers the annual abundance estimates in the years at either end of the  
353 trend period, we refer to this estimate as an end-point trend. For the GAMYE model, we  
354 decomposed the trajectory (i.e., the series of annual indices of abundance) into long- and  
355 medium-term components represented by the GAM smooth and annual fluctuations represented  
356 by the random year-effects. This decomposition allowed us to estimate two kinds of trend  
357 estimates:  $R_{a,b}$  that include all aspects of the trajectory, and  $R'_{a,b}$  that removes the annual  
358 fluctuations, including only the GAM smooth components.

359 Population trajectories are the collection of annual indices of relative abundance across the time  
360 series. These indices approximate the mean count on an average BBS route, conducted by an

361 average observer, in a given stratum and year. For all the models here, we calculated these  
362 annual indices for each year  $t$  and stratum  $s$  following Smith et al. (2019) as

$$N_{s,t} = z_s * \frac{\sum_{j \in J_s} e^{A_{s,t} + \omega_j + 0.5 * \sigma_\varepsilon^2}}{n_{J_s}}$$

363 where each  $N_{s,t}$  are exponentiated sums of the relevant components of the model ( $A_{s,t}$ ),  
364 observer-route effects ( $\omega_j$ ), and count-level extra-Poisson variance ( $0.5 * \sigma_\varepsilon^2$ ), averaged over  
365 count-scale predictions across all of the  $n_{J_s}$  observer-routes  $j$  in the set of observer-route  
366 combinations in stratum  $s$  ( $J_s$ ), and then multiplied by a correction factor for the proportion of  
367 routes in the stratum on which the species has been observed ( $z_s$ , i.e., the proportion of routes on  
368 which the species has been observed, on all other routes species abundance is assumed to equal  
369 zero and they are excluded from the model, see Sauer and Link 2011). This is slightly different  
370 from the approach described in Sauer and Link (2011) and Smith et al. (2015), and an area of  
371 ongoing research. We have found that this different annual index calculation ensures that the  
372 annual indices are scaled more similarly to the observed mean counts, which can affect the  
373 relative weight of different strata in trends estimated for broader regions (e.g., continental and  
374 national trends), but it has no effect of the trends estimated within each stratum and no effect on  
375 the cross-validation results presented here. For a discussion on the differences between these two  
376 ways of calculating annual indices, refer to the Supplemental Material.

377 For the GAMYE model, we calculated two versions of the species trajectory ( $N_s$ ): one that  
378 included the annual variation in the trajectory,

$$N_{s,t} = z_s * \frac{\sum_{j \in J_s} e^{A_{s,t} + \omega_j + 0.5 * \sigma_\varepsilon^2}}{n_{J_s}}$$

$$A_{s,t} = \theta_s + f_s(t) + \gamma_{s,t}$$

379 and a second that excluded the annual variations, including only the smoothing components of  
380 the GAM to estimate the time-series,

$$Ng_{s,t} = z_s * \frac{\sum_{j \in J_s} e^{Ag_{s,t} + \omega_j + 0.5 * \sigma_\epsilon^2}}{n_{J_s}}$$

$$Ag_{s,t} = \theta_s + f_s(t)$$

381 We calculated population trajectories and trends from the GAMYE model using both sets of  
382 annual indices ( $N_{s,t}$  and  $Ng_{s,t}$ ). When comparing predictions against the other models, we use  
383 the  $N_{s,t}$  values to plot and compare the population trajectories (i.e., including the year-effects),  
384 and the  $Ng_{s,t}$  values to calculate the trends (i.e., removing the year-effect fluctuations).

## 385 **RESULTS**

### 386 **Model predictions:**

387 Population trajectories from the GAM, GAMYE, and DIFFERENCE are very similar. All three  
388 of these models suggest that Barn Swallow populations increased from the start of the survey to  
389 approximately the early 1980s, compared to the SLOPE model predictions that show a relatively  
390 steady rate of decline (Figure 1). The trajectories for all species from both GAMs and the  
391 DIFFERENCE model were less linear overall than the SLOPE model trajectories and tended to  
392 better track nonlinear patterns, particularly in the early years of the survey and often in more  
393 recent years as well (Figure 1, Supplemental Materials Figures S1 and S6). GAM and GAMYE  
394 trajectories vary a great deal among the strata, particularly in the magnitude and direction of the  
395 long-term change (Figure 2 for Barn Swallow). However, there are also many similarities among

396 the strata, in the non-linear patterns that are evident in the continental mean trajectory (e.g., the  
397 downward inflection in the early 1980s in Figure 2 and Supplemental Materials Figure S2).  
398 Figure 3 shows the estimate trajectories for Barn Swallow in the 6 strata that make up BCR 23  
399 from the GAMYE, DIFFERENCE, and SLOPE models. The GAMYE estimates suggest that the  
400 species' populations increased in the early portion of the time series in all of the strata, and this is  
401 a pattern shared with the continental mean trajectory for the species (Figure 2). By contrast, the  
402 estimates from the SLOPE model only show an increase in the stratum with the most data, (i.e.,  
403 the most stacked grey dots along the x-axis indicating the number of BBS routes contributing  
404 data in each year, US-WI-23), the DIFFERENCE model shows more of the early increase in  
405 many strata, except those with the fewest data. In the other strata with fewer data the SLOPE  
406 trajectories are strongly linear and the DIFFERENCE trajectories are particularly flat in the early  
407 years with particularly few data. The cross-validation results suggest that for Barn Swallow, the  
408 GAMYE is preferred over the SLOPE model, and generally preferred (some overlap with 0) to  
409 the DIFFERENCE model (Figure 4), particularly in the early years of the survey (pre-1975,  
410 Supplemental Materials Figure S6). Finally, the general benefits of sharing information among  
411 strata on the shape of the population trajectory are evident for the GAM, GAMYE, and the  
412 SLOPE models in Figure 5, where there is no relationship between the sample size and the  
413 absolute value of the long-term trend for Cooper's Hawk (more below).

414 For most species here, the GAMs or the DIFFERENCE model generally were preferred over the  
415 SLOPE model (Figure 4). For the two species with population trajectories that are known to  
416 include strong year-effects (Carolina Wren and Pine Siskin), the GAM model that does not  
417 include year-effects performed poorly (Figure 4). For Carolina Wren, the DIFFERENCE model  
418 was preferred clearly over the GAMYE (Figure 4), and yet the predicted trajectories from the

419 two models are extremely similar (Figure 1). By contrast, for Pine Siskin the DIFFERENCE and  
420 GAMYE were very similar in their predictive accuracy (Figure 4) and yet the predicted  
421 trajectories are noticeably different in the first 10-years of the survey (Supplementary Materials  
422 Figure S1). For Cooper's Hawk, the GAMYE model was generally preferred over the  
423 DIFFERENCE model, although there was some overlap with zero (Figure 4), but in this case, the  
424 predicted trajectories are very different. The DIFFERENCE trajectory for Cooper's Hawk  
425 suggests much less change in the species' population over time than the GAM or GAMYE  
426 (Figure 1).

427 Cooper's Hawk provides an example of a species with very sparse data, for which the sharing of  
428 information in space may be particularly relevant. In a single stratum, the model has relatively  
429 few data with which to estimate changes in populations through time. For example, the mean  
430 counts for the species indicate that on average one bird was observed for every 40 BBS-routes  
431 run in the 1970s, and since the species population has increased it still requires more than 10  
432 routes to observe a single bird. For this species, the models that share information among strata  
433 on population change (GAM, GAMYE, and SLOPE), suggest greater change in populations than  
434 the DIFFERENCE. For these models, where the stratum-level population change parameters are  
435 able to share information across the species' range, the absolute change in the population does  
436 not depend on the sample size in the region. In addition, for each of these models, there is still  
437 large variability in the trends estimated for data-sparse regions, demonstrating that while the  
438 estimates benefit from the sharing of information among strata, the local trends are still  
439 influenced by the local data. By contrast, there is a strong relationship between the magnitude of  
440 the trend and the number of routes contributing data to the analysis for the DIFFERENCE model  
441 (Figure 5). In strata with fewer than 10 routes contributing data, the DIFFERENCE trends are

442 almost all very close to zero. In these relatively data-sparse strata, the DIFFERENCE model has  
443 very little information available to estimate population change, and so the prior is more relevant  
444 and the population changes are shrunk towards zero. By contrast, the other models can integrate  
445 data from the local stratum with information on changes in the species' population across the rest  
446 of the its range.

447 The decomposed trajectories from the GAMYE allow us to calculate trends from the smooth but  
448 also plot trajectories that show the annual fluctuations. For example, the smooth trajectory for the  
449 Carolina Wren captures the general patterns of increases and decreases well, while the full  
450 trajectory also shows the sharp population crash associated with the extreme winter in 1976  
451 (Figure 6). Calculating trends from the smooth component generates short-term estimates that  
452 vary less from year to year for species with relatively strong annual fluctuations (Figure 7). For  
453 example, Figure 8 shows the series of short-term (10-year) trend estimates for Wood Thrush in  
454 Canada, from the smooth component of the GAMYE, the GAMYE including the year-effects,  
455 the DIFFERENCE model, and the SLOPE model used since 2011. In this example, the 10-year  
456 trend estimate from the GAMYE with the year-effects and the SLOPE model both cross the  
457 IUCN trend threshold criterion for Threatened (IUCN 2019) at least once in the last 12 years,  
458 including 2011, when the species' status was assessed in Canada (COSEWIC 2012). By contrast,  
459 a trend calculated from the decomposed GAMYE model using only the smooth component  
460 (GAMYE – Smooth Only in Figure 8) fluctuates much less between years.

#### 461 **Cross-validation varies in time and space**

462 The preferred model from the pairwise predictive fit comparisons varied in time and space  
463 (Figures 4, 9, 10 and Supplemental Material Figure S6). The contrast between GAMYE and  
464 DIFFERENCE for Barn Swallow provide a useful example: Depending on the year or the region

465 of the continent, either the GAMYE or the DIFFERENCE model was the preferred model, but  
466 overall, and in almost all regions and years, the 95% CI of the mean difference in fit between  
467 GAMYE and DIFFERENCE overlapped 0 (Figures 4, 9 and 10). For Barn Swallow, the  
468 GAMYE model has generally higher predictive fit during the first 5 years of the time-series, but  
469 then the DIFFERENCE model is preferred between approximately 1975 and 1983. The  
470 geographic variation in predictive fit is similarly complex. In the Eastern parts of the Barn  
471 Swallow's range, the GAMYE model generally outperforms the DIFFERENCE model, whereas  
472 the reverse is generally true in the remainder of the species' range (Figure 10). Although the  
473 mapped colours only represent the point-estimates, they suggest an interesting spatial pattern in  
474 the predictive fit of these two models for this species. Many of species considered here show  
475 similarly complex temporal and spatial patterns in the preferred model based on predictive fit  
476 (Supplemental Material Figures S6).

## 477 **DISCUSSION**

478 Using Bayesian hierarchical semi-parametric GAM smooths to model time series of population  
479 abundance with the North American Breeding Bird Survey generates useful estimates of  
480 population trajectories and trends and has better or comparable out of sample predictive  
481 accuracy, in comparison to the SLOPE or DIFFERENCE model. The flexibility of the GAM  
482 smoothing structure to model long- and medium-term temporal patterns, and the optional  
483 addition of random year-effects to model annual fluctuations, allow it to model a wide range of  
484 temporal patterns within a single base-model (Fewster et al. 2000, Wood 2017). We fit the  
485 smoothing parameters as random effects, to share information across geographic strata within a  
486 species' range, and to improve the estimates of population trajectories for data-sparse regions  
487 (Pedersen et al. 2018). For almost all species included here, the two GAM-based models clearly



488 out-performed the standard model (SLOPE) used for the CWS and USGS analyses since 2011  
489 (Sauer and Link 2011, Smith et al. 2014), and showed similar out of sample predictive accuracy  
490 as a first-difference, random-walk trajectory model (Link et al. 2020). On a practical note, the  
491 GAM-based models required approximately 40% more time than the SLOPE or DIFFERENCE  
492 model to generate a similar number of posterior samples, but given the 53 years of effort to  
493 collect the data, we suggest this is a small price to pay for useful status and trend estimates.

494 The decomposition of the estimated population trajectory into the smooth and year-effect  
495 components is a feature of the GAMYE that is particularly useful for conservation applications.  
496 It allows the user to estimate and visualize separate trends and trajectories that include or exclude  
497 the annual fluctuations (Knappe 2016). This allows the estimates to suit a range of conservation  
498 and management applications that rely on visualizing and estimating multiple aspects of  
499 population change. For example, the smoothed population trajectories capture the medium- and  
500 long-term changes in populations that are most relevant to broad-scale, multi-species  
501 assessments like the “State of the Birds” reports (NABCI-Canada 2019) where the annual  
502 fluctuations of a given species are effectively noise against the signal of community level change  
503 over the past 50 years (e.g., Rosenberg et al. 2019). Similarly, estimates of population trends  
504 (interval-specific, rates of annual change) derived from the smooth component are responsive to  
505 medium-term changes and so can be used to identify change points in trends such as the recovery  
506 of Species at Risk (Environment Climate Change Canada 2016).

507 Trends derived from the smooth component of the GAMYE are responsive to medium-term  
508 changes, but also much less likely to fluctuate from year to year and therefore more reliable for  
509 use in species at risk status assessments (James et al. 1996). In many status assessments, such as  
510 those by IUCN and COSEWIC, population declines beyond a particular threshold rate can

511 trigger large investments of resources related to policy and conservation actions. For example, in  
512 both the IUCN red-listing and Canada's federal species at risk assessments (IUCN 2019)  
513 estimated population declines greater than 30% over three generations is one criteria that results  
514 in a "Threatened" designation. If the estimated rate of population decline fluctuates from year to  
515 year, and is therefore strongly dependent on the particular year in which a species is assessed,  
516 there is an increased risk of inaccurate assessments. These inaccuracies could result in failures to  
517 protect species or inefficient investments of conservation resources. Of course, the full  
518 assessments of species' status are sophisticated processes that consider more than just a single  
519 trend estimate. However, the example of Wood Thrush trends for Canada in Figure 8 shows that  
520 trends used to assess the species were below the threshold for "Threatened" status in 2011, but  
521 not in either year adjacent to 2011. The smooth-only trend never dips below the threshold  
522 (Figure 8) and raises the question of whether Wood Thrush would have been assessed as  
523 Threatened in Canada if the relevant trend had not been estimated in 2011, or had been estimated  
524 using a different model (COSEWIC 2012).

525 Alternative metrics of population trends that remove the annual fluctuations have been used with  
526 for the BBS, such as LOESS smooths (James et al. 1996) or slopes of log-linear regression lines  
527 calculated as part of the underlying model (Link and Sauer 1994) or as derived parameters from  
528 series of estimated annual indices (Sauer and Link 2011). Trend estimates that remove the effect  
529 of the annual fluctuations are generally a very common approach to summarizing average rates  
530 of change in other monitoring programs (e.g., Fewster et al. 2000 for UK breeding birds,  
531 Bogaart, et al. 2020, for European breeding birds). Many alternative definitions of trend could be  
532 calculated using the annual indices derived from any one of the models compared here. However  
533 for the last decade, both national agencies have supplied authoritative trend estimates based on

534 end-point comparisons of annual indices, which include the annual fluctuations (Sauer and Link  
535 2011, Smith et al. 2015). Similarly, calculating alternative metrics of trend from the annual  
536 indices in a way that propagates uncertainty would be done best using information from the full  
537 posterior distribution of each annual index. Given that these full posterior distributions are  
538 challenging for users to manipulate and summarize, we suggest that providing the authoritative  
539 trends based on the smooth component from the GAMYE is a practical and simple solution.  
540 These smooth-based trends are responsive to cycles or changes in rates of population change  
541 (discussed in James et al. 1996 and Sauer and Link 2011) while they also limit the annual  
542 fluctuations that might otherwise undermine the utility and credibility of BBS-trends for species  
543 status assessments (see also Smith et al. 2015).

544 In some conservation or scientific uses of the BBS-based population trajectories, the annual  
545 fluctuations may be important components of the trajectory (e.g., winter-related mortality of  
546 Carolina Wrens), and in these situations both components from the GAMYE can be presented.  
547 This comprehensive estimate of a species' population trajectory is likely the best approach for  
548 the official presentation of a time series. At a glance, managers, conservation professionals, and  
549 researchers can glean information about fluctuations that might relate to annual covariates such  
550 as precipitation, wintering ground conditions, or cone-crop cycles. The GAMYE structure allows  
551 an agency like the CWS to provide estimates in multiple versions (e.g., full trajectories and  
552 smoothed trajectories in the same presentation, such as Figure 6), drawn from a coherent model,  
553 to suit a wide range of conservation applications, and to produce them in an efficient way. For  
554 example, there are situations where the ability for a user to access a ready-made separation of the  
555 yearly fluctuations from the underlying smooth could be helpful in the initial formulation of an  
556 ecological hypothesis. In addition, for custom analyses (Edwards and Smith 2020) a researcher

557 can modify the basic GAMYE model to include annual covariates on the yearly fluctuations  
558 (e.g., extreme weather during migration, or spruce cone mast-years) and other covariates on the  
559 smooth component (e.g., climate cycles).

#### 560 **Predictive accuracy**

561 Overall, the cross-validation comparisons generally support the GAMYE, GAM, or  
562 DIFFERENCE model over the SLOPE model for the species considered here, in agreement with  
563 Link et al. (2020). For Barn Swallow, the overall difference in predictive fit, and particularly the  
564 increasing predictive error of the SLOPE model in the earliest years, strongly suggests that in the  
565 period between the start of the BBS (1966) and approximately 1983 (Smith et al. 2015), Barn  
566 Swallow populations increased. All models agree, however, that since the mid-1980's  
567 populations have decreased.

568 Using all data in our cross-validations allowed us to explore the spatial and temporal variation in  
569 fit, and to compare the fit across all data used in the model. We have not reported absolute values  
570 of predictive fit because estimates of fit from a random selection of BBS counts, or simple  
571 summaries of predictive fit from the full dataset, are biased by the strong spatial and temporal  
572 dependencies in the BBS data (Roberts et al. 2017). However, because our folds were identical  
573 across models, and we modeled the differences in fit with an additional hierarchical model that  
574 accounted for repeated measures among strata and years, we are reasonably confident that  
575 relative-fit assessments are unbiased within a species and among models. Alternative  
576 approaches, such as blocked cross-validation (Roberts et al. 2017) to assess the predictive  
577 success of models in time and space, and targeted cross-validation (Link et al. 2017) to explore  
578 the predictive success in relation to particular inferences (e.g., predictive accuracy in the end-  
579 point years used for short- and long-term trend assessments) are an area of ongoing research.

580 The overall predictive fit assessments provided some guidance on model selection for the species  
581 here, but not in all cases. The SLOPE model compared poorly against most other models in the  
582 overall assessment, similar to Link et al. 2020. However, among the other three models, many of  
583 the overall comparisons failed to clearly support one model, even in cases where the predicted  
584 population trajectories suggested very different patterns of population change (e.g., Cooper's  
585 Hawk). For a given species, the best model varied among years and strata. These temporal and  
586 spatial patterns in predictive fit complicate the selection among models, given the varied uses of  
587 the BBS status and trend estimates (Rosenberg et al. 2017).

588 In general, estimates of predictive accuracy are one aspect of a thoughtful model building and  
589 assessment process, but are insufficient on their own (Gelman et al. 2013 pg. 180, Burnham and  
590 Anderson 2002 pg. 16). This is particularly true if there is little or no clear difference in overall  
591 predictive accuracy, but important differences in model predictions. For example, the overall  
592 cross validation results do not clearly distinguish among the SLOPE, DIFFERENCE, and  
593 GAMYE for Cooper's Hawk, and yet predictions are very different between the DIFFERENCE  
594 model and the others (Figures 1, 4, and 5). Interestingly, the cross-validation approach in Link et  
595 al. 2020 suggested that the DIFFERENCE model was preferred over the SLOPE for Cooper's  
596 Hawk, but we did not find that here (Supplemental Material Figure S3). The important  
597 differences in trend estimates and the equivocal cross-validation results suggests further research  
598 is needed into the criteria for, and consequences of, model selection for BBS status and trend  
599 estimates. Model selection is also complicated when overall predictive accuracy appears to  
600 clearly support one model and yet the important parameters (trends and trajectories) are not  
601 noticeably different. For example, the overall cross validation results for Carolina Wren suggest  
602 the DIFFERENCE model is preferred over the GAMYE, and yet the trajectories are almost

603 identical (Figures 1 and 4). Predictive accuracy is also complicated when robust predictions are  
604 required for years or regions with relatively few data against which predictions can be assessed  
605 (e.g., the earlier years of the BBS, or data-sparse strata that still have an important influence on  
606 the range-wide trend). Model selection is complicated, and predictive accuracy would never be  
607 the only criterion used to select a model for the BBS analyses. Limits to computational capacity  
608 and a desire to avoid a data-dredging all-possible-models approach ensure that some thoughtful  
609 process to select the candidate models is necessary.

610 We agree with Link et al. (2020) that we should not select models based on a particular pattern in  
611 the results. In fact, the necessary subjective process occurs before any quantitative analyses  
612 (Burnham and Anderson 2002), and relies on “careful thinking” to balance the objectives; the  
613 model; and the data (Chatfield 1995). The careful thinking required to select a BBS model or to  
614 interpret the BBS status and trend estimates, is to consider the consequences of the potential  
615 conflicts between the model structures (“constraints on the model parameters” sensu Chatfield  
616 1995) and the objectives of the use of the modeled estimates. For example, one of the models  
617 that shares information on population change among strata is likely preferable to the  
618 DIFFERENCE model for species with relatively sparse data in any given stratum, because the  
619 prior of the DIFFERENCE model (stable-population) will be more influential when the data are  
620 sparse. This prior-dependency of the results may not be identified by lower predictive accuracy  
621 of the estimates, as we the results for Cooper’s Hawk demonstrate (Figures 5). Similarly, a user  
622 of estimates from the DIFFERENCE model should carefully consider the conservation-relevant  
623 consequences of the prior and model structure when assessing potential changes in the  
624 population trends of declining and relatively rare species. These species’ short-term rates of  
625 decline could appear to decrease, suggesting a stabilizing population, simply due to the

626 increasing influence of the prior, if the species observations decline to a point where it is not  
627 observed in some years. In contrast, if a user wished to explicitly compare estimates of  
628 population change among political jurisdictions or ecological units, the sharing of information  
629 among those units in the GAM-based models here might be problematic. We suggest that the  
630 GAMYE's strong cross-validation performance, its sharing of information across a species  
631 range, its decomposition of the population trajectory, and its broad utility that suits the most  
632 common uses of the BBS status and trends estimates, make it a particularly useful model for the  
633 sort of omnibus analyses conducted by the CWS and other agencies.

634 **REFERENCES CITED**

635 Bogaart, P., van der Loo, M., and Pannekoek, J. (2020). rtrim: Trends and Indices for Monitoring  
636 Data. R package version 2.1.1.

637 Burnham, K.P., and D.R. Anderson. (2002). Model selection and multimodel inference: a  
638 practical information-theoretic approach. Second edition. Springer-Verlag, New York,  
639 New York, USA.

640 Chatfield, C. (1995). Model uncertainty, data mining and statistical inference (with discussion).  
641 Journal of the Royal Statistical Society (London), Series A 158:419–466.  
642 doi:10.2307/2983440

643 COSEWIC. (2012). COSEWIC assessment and status report on the Wood Thrush *Hylocichla*  
644 *mustelina* in Canada. Committee on the Status of Endangered Wildlife in Canada.  
645 Ottawa.

646 Crainiceanu CM, Ruppert D, Wand MP (2005). Bayesian Analysis for Penalized Spline  
647 Regression Using WinBUGS. Journal of Statistical Software, 14 (14).  
648 doi:10.18637/jss.v014.i14

649 Duan, N. (1983). Smearing Estimate: A Nonparametric Retransformation Method. Journal of the  
650 American Statistical Association, Vol. 78, No. 383, pp. 605-610. doi:10.2307/2288126

651 Edwards, B.P.M. and A.C. Smith (2020). bbsBayes v2.1.0 (Version 2.1.0). Zenodo.  
652 doi:10.5281/zenodo.3727279

653 Environment Climate Change Canada (2016). Recovery Strategy for the Canada Warbler  
654 (*Cardellina canadensis*) in Canada. Species at Risk Act Recovery Strategy Series.



- 655 Environment Canada, Ottawa. vii + 56 pp. Available at: <http://www.registrelep->  
656 [sararegistry.gc.ca](http://www.registrelep-sararegistry.gc.ca), accessed February 13, 2020.
- 657 Fewster, R. M., S. T. Buckland, G. M. Siriwardena, S. R. Baillie, and J. D. Wilson (2000). Analysis  
658 of population trends for farmland birds using generalized additive models. *Ecology*  
659 81:1970–1984. doi: 10.2307/177286
- 660 Gelman, A. (2006). Prior distributions for variance parameters in hierarchical models. *Bayesian*  
661 *Analysis*. 1:515-533. doi:10.1214/06-BA117A
- 662 Gelman, A., J. Hwang, and A. Vehtari (2014). Understanding predictive information criteria for  
663 Bayesian models. *Statistics and Computing* 24:997-1016. doi:10.1007/s11222-013-9416-  
664 2
- 665 Gelman, A., J. B. Carlin, H. S. Stern, D. B. Dunson, A. Vehtari and D. B. Rubin. (2013).  
666 *Bayesian Data Analysis*, Chapman and Hall/CRC Boca Raton.
- 667 Hudson, M.-A. R., Francis, C. M., Campbell, K. J., Downes, C. M., Smith, A. C., & Pardieck, K.  
668 L. (2017). The role of the North American Breeding Bird Survey in conservation. *The*  
669 *Condor*, 119(3), 526–545. <https://doi.org/10.1650/CONDOR-17-62.1>
- 670 IUCN Standards and Petitions Committee. (2019). Guidelines for Using the IUCN Red List  
671 Categories and Criteria. Version 14. Prepared by the Standards and Petitions Committee.  
672 Downloadable from <http://www.iucnredlist.org/documents/RedListGuidelines.pdf>.
- 673 James, F. C., McCulloch, C. E., & Wiedenfeld, D. A. (1996). New Approaches to the Analysis of  
674 Population Trends in Land Birds. *Ecology*, 77(1), 13–27. <https://doi.org/10.2307/2265650>  
675

- 676 Lange, K. L., Little, R. J. A, and J. M. G. Taylor (1989). Robust Statistical Modeling Using the *t*  
677 Distribution. *Journal of the American Statistical Association*, 84:408, 881-896,  
678 DOI:10.2307/2290063
- 679 Knape, J. (2016). Decomposing trends in Swedish bird populations using generalized additive  
680 mixed models. *Journal of Applied Ecology*, 53, 1852–1861. doi: 10.1111/1365-  
681 2664.12720
- 682 Kohavi, R. (1995). A study of cross-validation and bootstrap for accuracy estimation and model  
683 selection. *Proceedings of the 14th International Joint Conference on Artificial*  
684 *Intelligence - Volume 2*, 1137–1143.
- 685 Link, W. A., & Sauer, J. R. (2002). A Hierarchical Analysis of Population Change with  
686 Application to Cerulean Warblers. *Ecology*, 83(10), 2832–2840.
- 687 Link, W., & Sauer, J.R. (2007). Seasonal Components of Avian Population Change: Joint  
688 Analysis of Two Large-Scale Monitoring Programs. *Ecology*, 88(1), 49-55.
- 689 Link, W. A. and J. R. Sauer (2016). Bayesian cross-validation for model evaluation and  
690 selection, with application to the North American Breeding Bird Survey. *Ecology*  
691 97:1746–1758. doi: 10.1890/15-1286.1
- 692 Link, W.A., J.R. Sauer, and D.K. Niven. (2017). Model selection for the North American  
693 Breeding Bird Survey: A comparison of methods. *Condor* 119(3):546–556. doi:  
694 10.1650/CONDOR-17-1.1
- 695 Link, W. A., J.R. Sauer, and D.K. Niven. (2020). Model selection for the North American  
696 Breeding Bird Survey Ecological Applications. <https://doi.org/10.1002/eap.2137>.

- 697 Microsoft and Weston, S. (2019). foreach: Provides Foreach Looping Construct. R package  
698 version 1.4.7. <https://CRAN.R-project.org/package=foreach>
- 699 North American Bird Conservation Initiative Canada. (2019). The State of Canada's Birds, 2019.  
700 Environment and Climate Change Canada, Ottawa, Canada. 12 pages.  
701 [www.stateofcanadasbirds.org](http://www.stateofcanadasbirds.org)
- 702 Partners in Flight. (2019). Avian Conservation Assessment Database, version 2019. Available at  
703 <http://pif.birdconservancy.org/ACAD>
- 704 Plummer, Martyn. (2003). JAGS: A program for analysis of Bayesian graphical models using  
705 Gibbs sampling.
- 706 Pedersen EJ, Miller DL, Simpson GL, Ross N. (2019). Hierarchical generalized additive models  
707 in ecology: an introduction with mgcv. PeerJ 7:e6876. doi: 10.7717/peerj.6876
- 708 R Core Team (2019). R: A language and environment for statistical computing. R Foundation  
709 for Statistical Computing, Vienna, Austria. URL <https://www.R-project.org/>.
- 710 Roberts, D. R., V. Bahn, S. Ciuti, M. S. Boyce, J. Elith, G. Guillera-Aroita, S. Hauenstein, J. J.  
711 Lahoz-Monfort, B. Schroder, W. Thuiller, D. I. Warton, B. A. Wintle, F. Hartig, and C.  
712 F. Dormann. (2017). Cross-validation strategies for data with temporal, spatial,  
713 hierarchical or phylogenetic structure. - Ecography doi: 10.1111/ecog.02881.
- 714 Robbins, C. S., D. Bystrak, and P. H. Geissler (1986). The Breeding Bird Survey: Its first fifteen  
715 years, 1965–1979. U.S. Fish and Wildlife Service Resource Publication 157.

- 716 Rosenberg, K. V., P. J. Blancher, J. C. Stanton, and A. O. Panjabi (2017). Use of North  
717 American Breeding Bird Survey Data in avian conservation assessments. *The Condor:*  
718 *Ornithological Applications* 119:594–606. doi: 10.1650/CONDOR-17-57.1
- 719 Rosenberg, K. V., Dokter, A. M., Blancher, P. J., Sauer, J. R., Smith, A. C., Smith, P. A.,  
720 Stanton, J.C., Panjabi, A., Helft, L., Parr, M., Marra, P.P. (2019). Decline of the North  
721 American avifauna. *Science* 366, 120–124. doi: 10.1126/science.aaw1313
- 722 Sauer, J. R., and W. A. Link. (2011). Analysis of the North American Breeding Bird Survey  
723 using hierarchical models. *The Auk* 128:87–98. doi: 10.1525/auk.2010.09220
- 724 Sauer, J.R., J.E. Hines, J.E. Fallon, K.L. Pardieck, D.J. Ziolkowski Jr., and W.A. Link. (2014).  
725 The North American Breeding Bird Survey, Results and Analysis 1966 – 2013. Version  
726 01.30.2015 USGS Patuxent Wildlife Research Center, Laurel, MD.
- 727 Sauer, J. R., Pardieck, K. L., Ziolkowski, D. J., Smith, A. C., Hudson, M.-A. R., Rodriguez, V.,  
728 Berlanga, H., Niven, D. K., & Link, W. A. (2017). The first 50 years of the North  
729 American Breeding Bird Survey. *The Condor*, 119(3), 576–593.
- 730 Smith A.C., M.-A.R. Hudson, C. Downes, and C.M. Francis (2014). Estimating breeding bird  
731 survey trends and annual indices for Canada: how do the new hierarchical Bayesian  
732 estimates differ from previous estimates. *Canadian Field-Naturalist* 128:119-134. doi:  
733 10.22621/cfn.v128i2.1565
- 734 Smith, A. C., M.-A.R. Hudson, C. Downes, and C.M. Francis (2015). Change points in the  
735 population trends of aerial-insectivorous birds in North America: synchronized in time  
736 across species and regions. *PLoS One* 10:e0130768. doi: 10.1371/journal.pone.0130768

- 737 Smith, A.C., Hudson, M-A.R. Aponte, V., and Francis, C.M. (2019). North American Breeding  
738 Bird Survey - Canadian Trends Website, Data-version 2017. Environment and Climate  
739 Change Canada, Gatineau, Quebec, K1A 0H3
- 740 Vehtari, A., Gelman, A., and Gabry, J. (2017). Practical Bayesian model evaluation using leave-  
741 one-out cross-validation and WAIC. *Statistics and Computing*. 27(5), 1413--1432.  
742 doi:10.1007/s11222-016-9696-4.
- 743 Wickham, H. (2016). *ggplot2: Elegant Graphics for Data Analysis*. Springer-Verlag New York
- 744 Wilson, S., Smith, A. C., & Naujokaitis-Lewis, I. (2018). Opposing responses to drought shape  
745 spatial population dynamics of declining grassland birds. *Diversity and Distributions*, 24,  
746 1687– 1698. doi: 10.1111/ddi.12811
- 747 Wood, S. N. (2017). *Generalized additive models: an introduction with R*; 2<sup>nd</sup> ed. CRC Press.  
748 Portland, OR, 2017
- 749 Zhang, Y., & Yang, Y. (2015). Cross-validation for selecting a model selection procedure.  
750 *Journal of Econometrics*, 187(1), 95–112. <https://doi.org/10.1016/j.jeconom.2015.02.006>
- 751

752 **FIGURES**

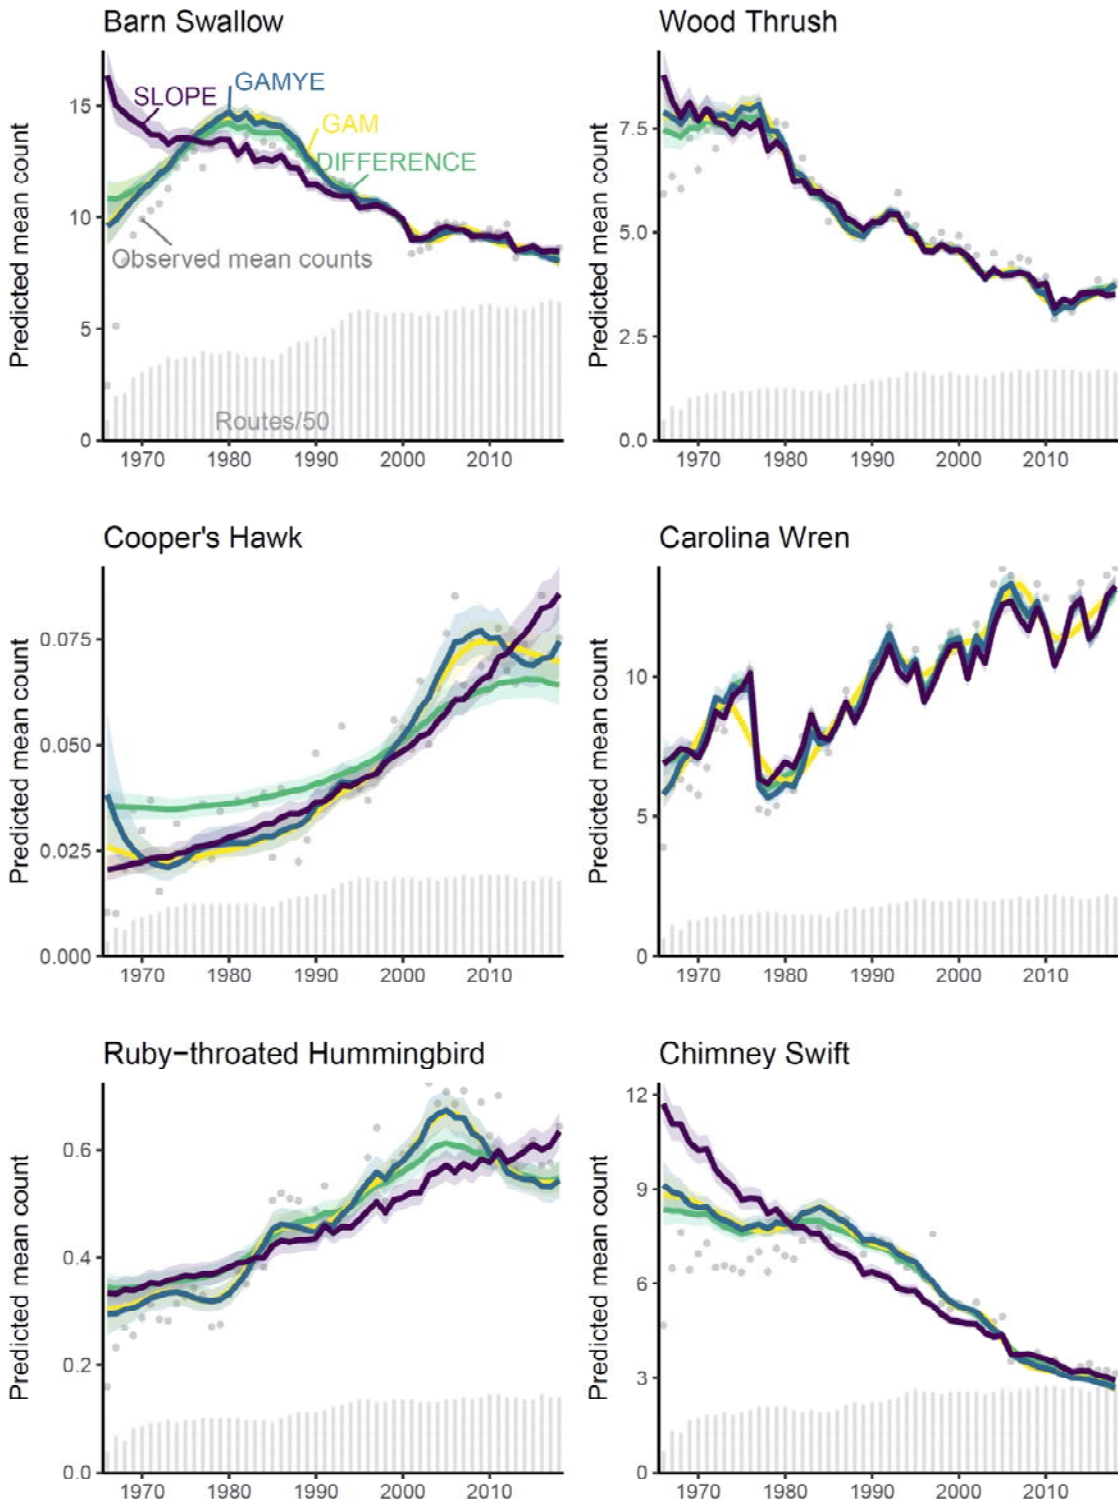

754 Figure 1. Survey-wide population trajectories for Barn Swallow (*Hirundo rustica*), Wood Thrush  
755 (*Hylocichla mustelina*), Cooper's Hawk (*Accipiter cooperii*), Carolina Wren (*Thryothorus*  
756 *ludovicianus*), Ruby-throated Hummingbird (*Archilochus colubris*), and Chimney Swift  
757 (*Chaetura pelagica*), estimated from the BBS using two models described here that include a  
758 GAM smoothing function to model change over time (GAM and GAMYE) the standard  
759 regression-based model used for BBS status and trend assessments since 2011 (SLOPE), and a  
760 first-difference time-series model (DIFFERENCE). The stacked dots along the x-axis indicate  
761 the approximate number of BBS counts used in the model in each year; each dot represents 50  
762 counts.

763

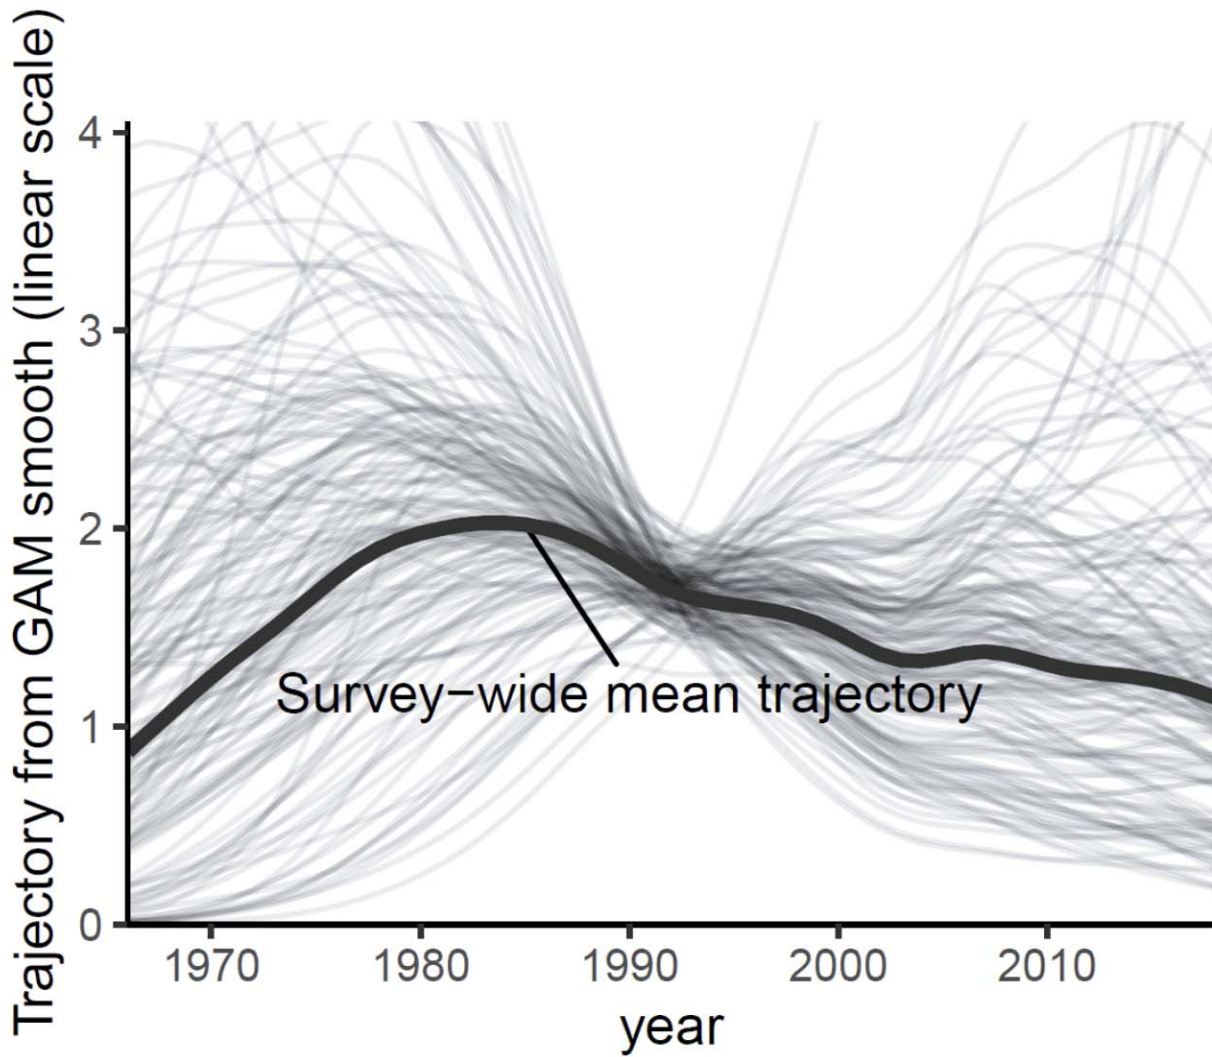

764

765 Figure 2. Variation among the spatial strata in the random-effect smooth components of the  
766 GAMYE model applied to Barn Swallow data from the BBS. Grey lines show the strata-level  
767 random-effect smooths, and the black lines shows the survey-wide mean trajectory.

768



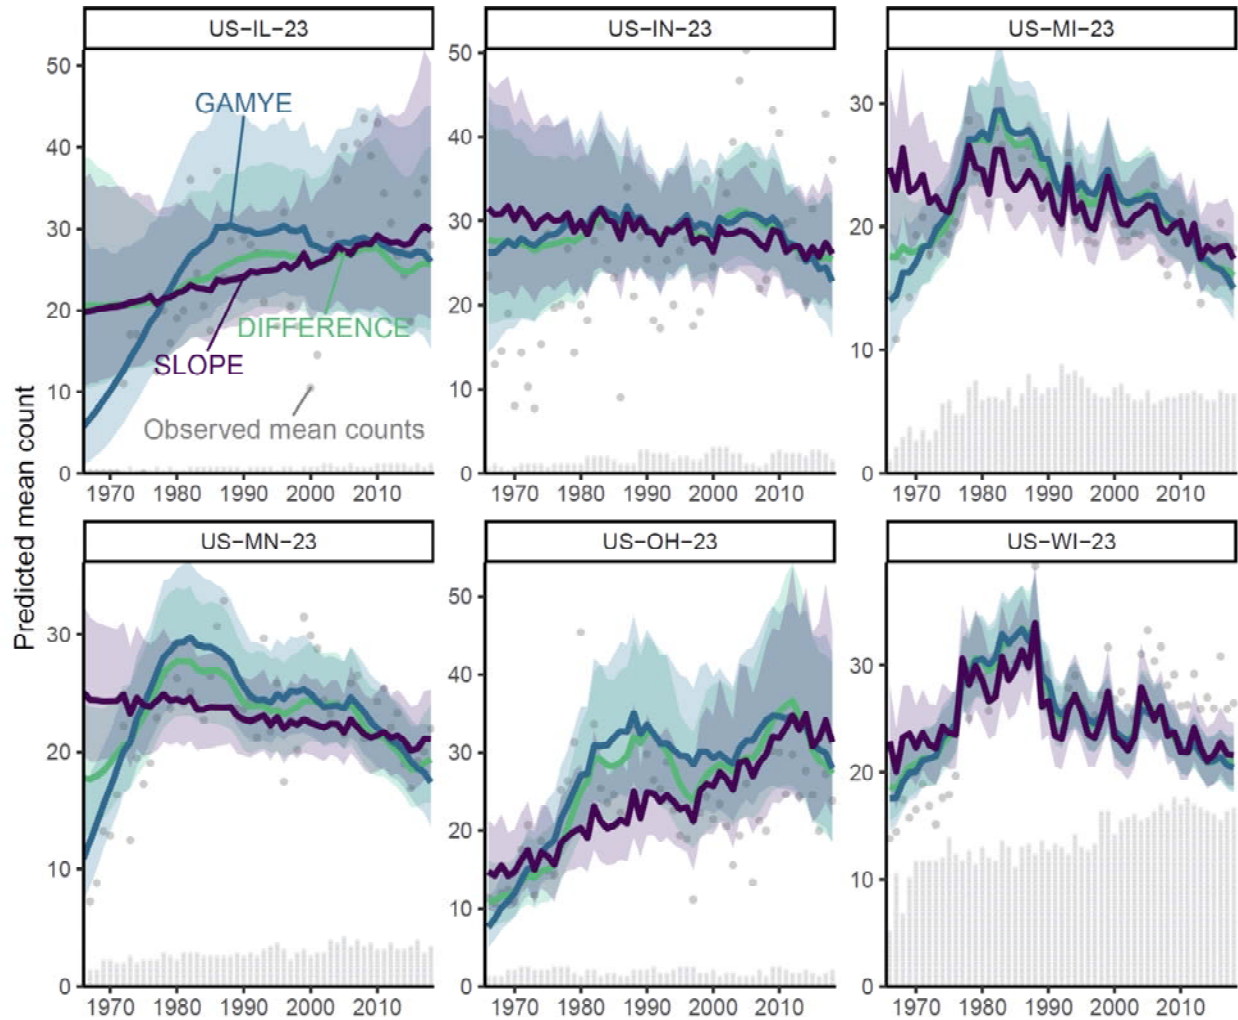

769

770 Figure 3. Stratum-level predictions for Barn Swallow population trajectories in BCR 23 from  
771 GAMYE against the predictions from the SLOPE and DIFFERENCE model. The similarity of  
772 the overall patterns in the GAMYE as compared to the SLOPE estimates, demonstrates the  
773 inferential benefits of the sharing of information among regions on the non-linear shape of the  
774 trajectory. In most strata the similar patterns of observed mean counts and the GAMYE  
775 trajectories suggests a steep increase in Barn Swallows across all of BCR 23 during the first 10-  
776 years of the survey. The GAMYE estimates show this steep increase in almost all of the strata,  
777 whereas the SLOPE predictions only show this pattern in the most data rich stratum, US-WI-23.

778 The DIFFERENCE trajectories model the non-linear shapes well in all but the most data-sparse  
779 region (US-IL-23) and years (< 1972). The facet strip labels indicate the country and state-level  
780 division of BCR 23 that makes up each stratum. The first two letters indicate all strata are within  
781 the United States, and the second two letters indicate the state. The stacked dots along the x-axis  
782 indicate the number of BBS counts in each year and stratum; each dot represents one count.

783

784

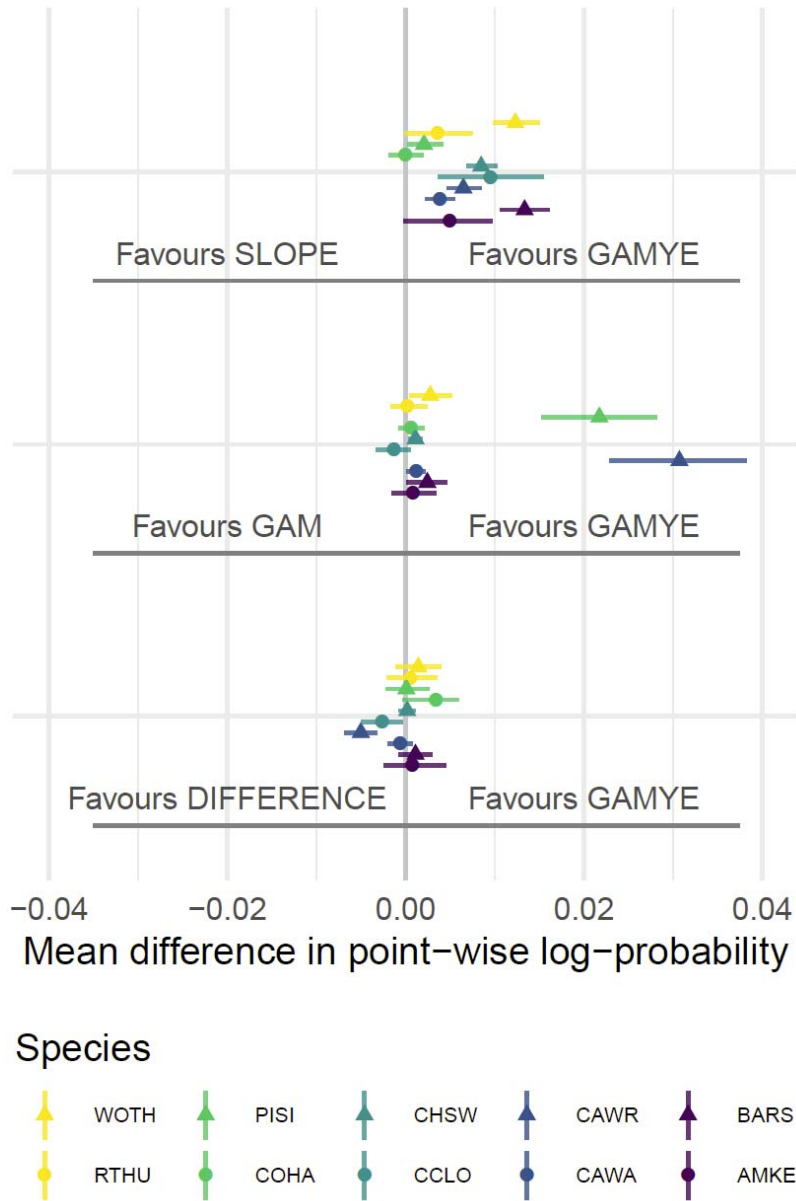

785

786 Figure 4. Overall differences in predictive fit between the GAMYE and SLOPE and GAMYE  
787 and GAM for Barn Swallow and 9 other selected species. Species short forms are WOTH =  
788 Wood Thrush (*Hylocichla mustelina*), RTHU = Ruby-throated Hummingbird (*Archilochus*  
789 *colubris*), PISI = Pine Siskin (*Spinus pinus*), Cooper's Hawk (*Accipiter cooperii*), CHSW =  
790 Chimney Swift (*Chaetura pelagica*), CCLO = Chestnut-collared Longspur (*Calcarius ornatus*),

791 CAWR = Carolina Wren (*Thryothorus ludovicianus*), CAWA = Canada Warbler (*Cardellina*  
792 *canadensis*), MAKE = American Kestrel (*Falco sparverius*).

793

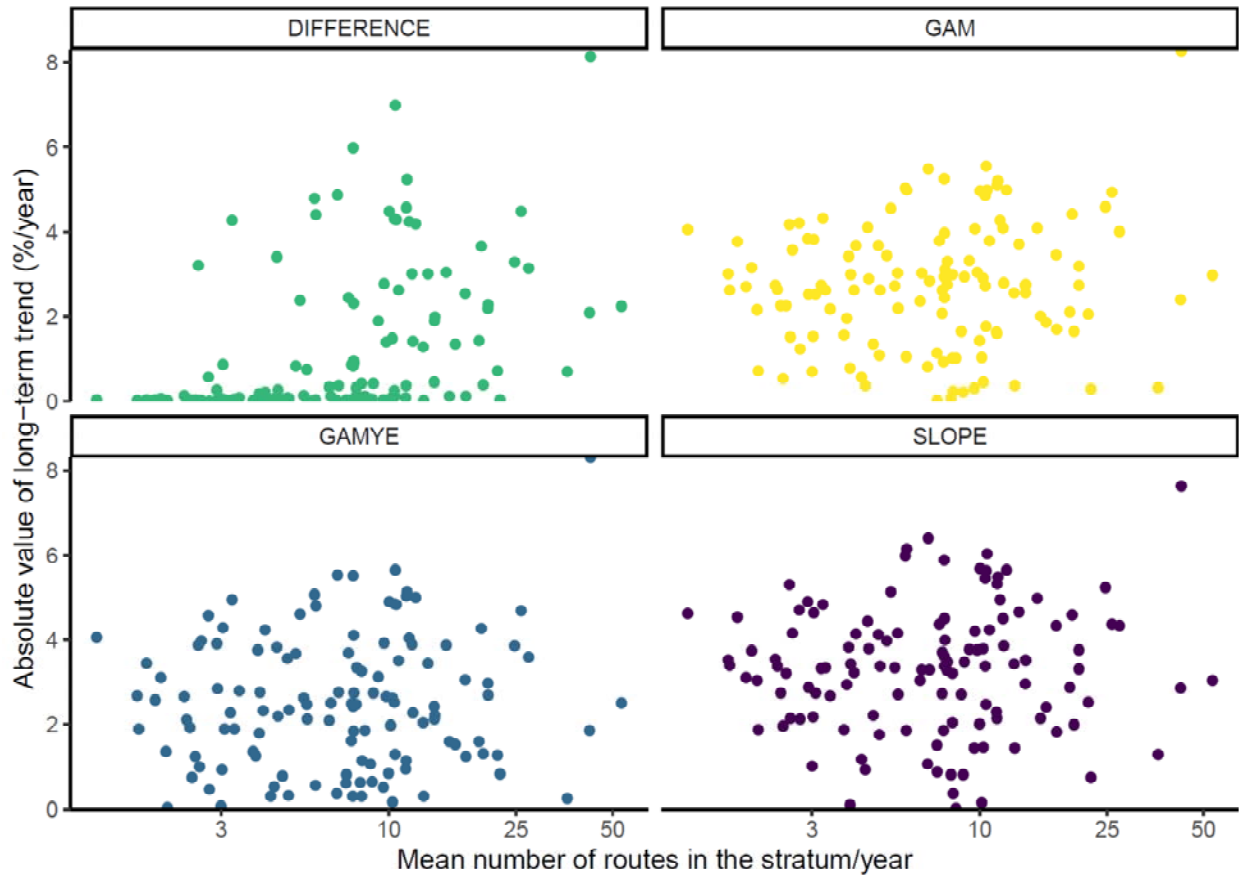

794

795 Figure 5. Relationship between the absolute value of estimated long-term trends (1966-2018) and  
796 the amount of data in each stratum, from the four models compared here for Cooper's Hawk, a  
797 species with relatively sparse data in each individual stratum. More of the trends estimated with  
798 the DIFFERENCE model are close to zero, suggesting a stable population, and particularly  
799 where there are relatively few routes contributing data in each year. This relationship is not  
800 evident for the same data modeled with one of the three models that are able to share some  
801 information among strata on population change (GAM, GAMYE, and SLOPE).

802

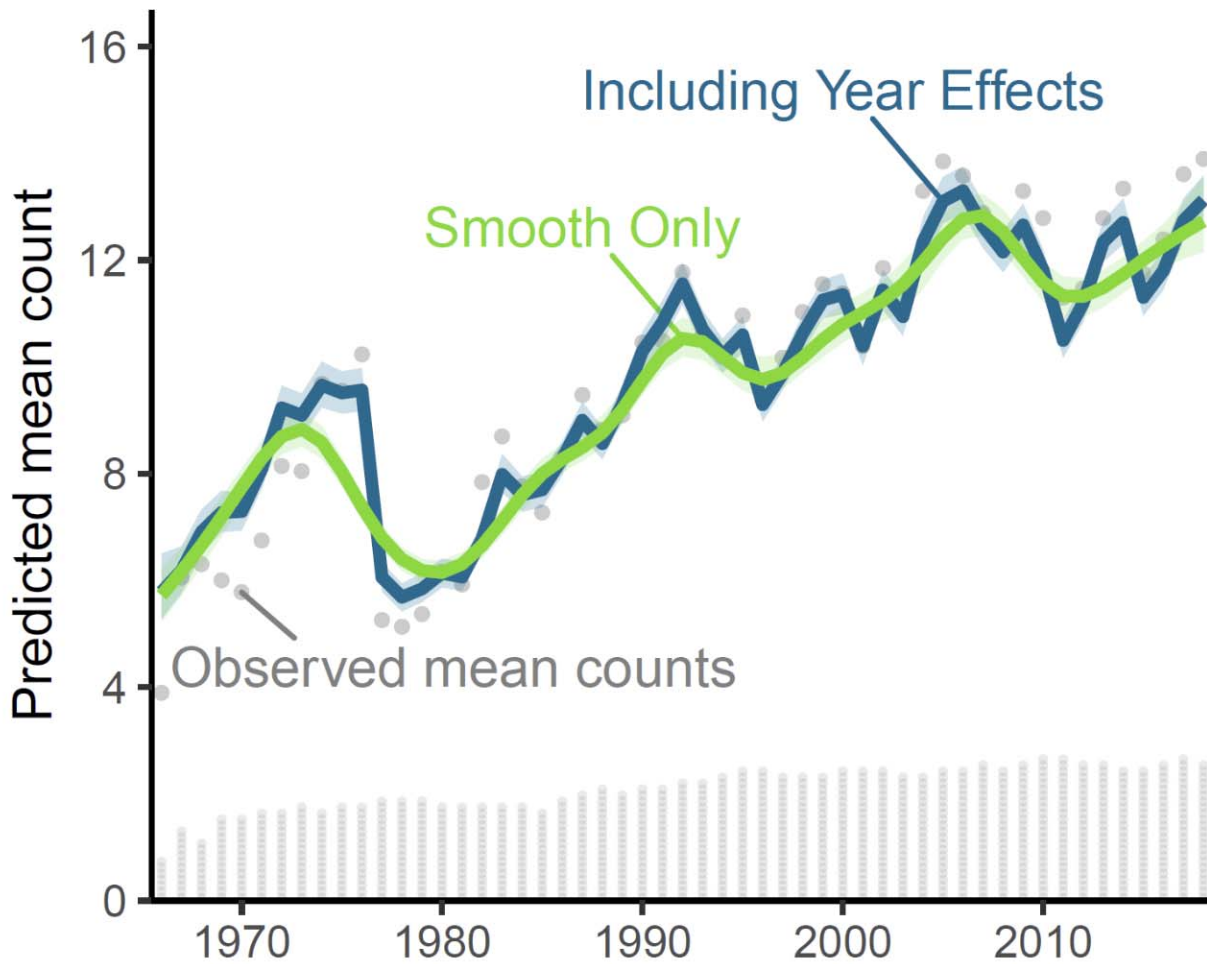

803

804 Figure 6. Decomposition of the survey-wide population trajectory for Carolina Wren  
805 (*Thryothorus ludovicianus*), from the GAMYE, showing the full trajectory (“Including Year  
806 Effects”,  $N_{s,t}$ ) and the isolated smooth component (“Smooth Only”,  $N_{g_{s,t}}$ ), which can be used to  
807 estimate population trends that are less sensitive to the particular year in which they are  
808 estimated. The stacked dots along the x-axis indicate the approximate number of BBS counts  
809 used in the model; each dot represents 50 counts.

810

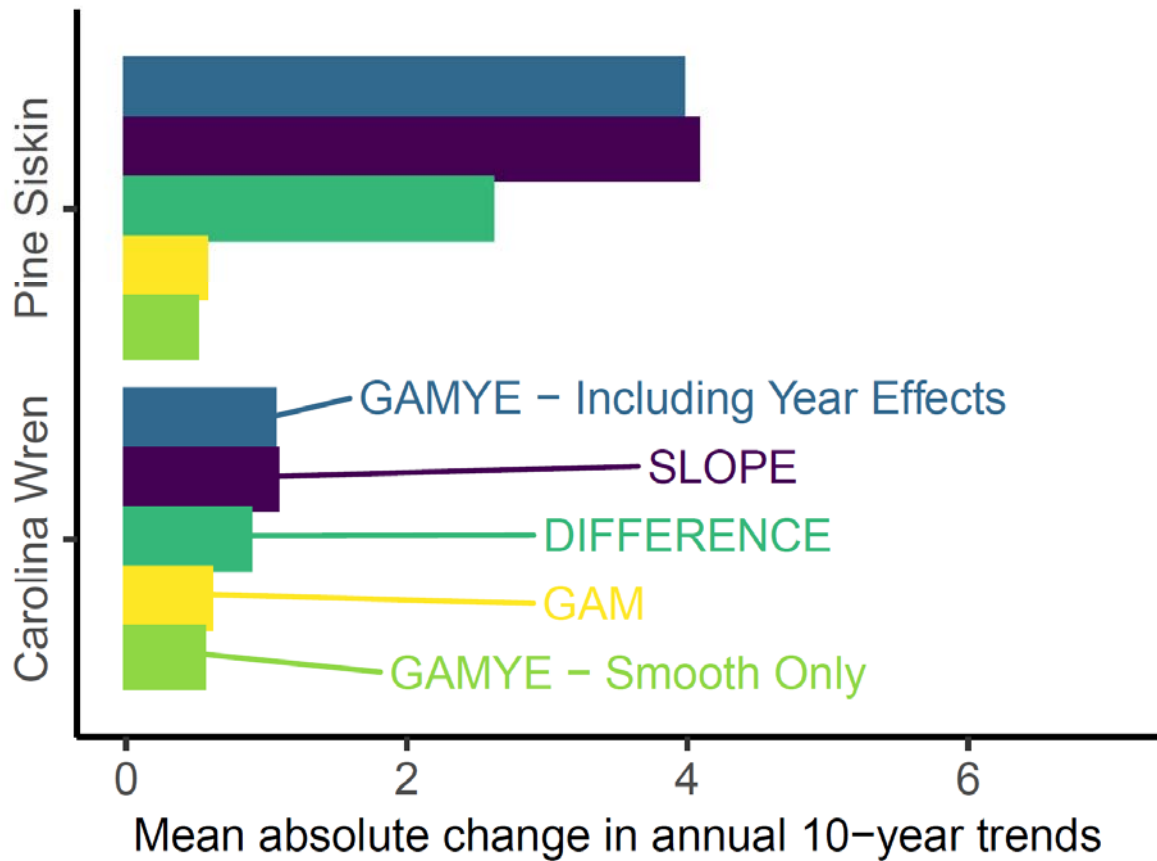

811

812 Figure 7. Inter annual variability of 10-year trend estimates for two species with large annual  
813 fluctuations (%/year). Trends from the GAM, which does not model annual fluctuations, and  
814 from the GAMYE using only the smooth component, which removes the effect of the annual  
815 fluctuations, are less variable between subsequent years (i.e., more stable) than trends from the  
816 GAMYE including the year-effects or the other two models that include the annual fluctuations.

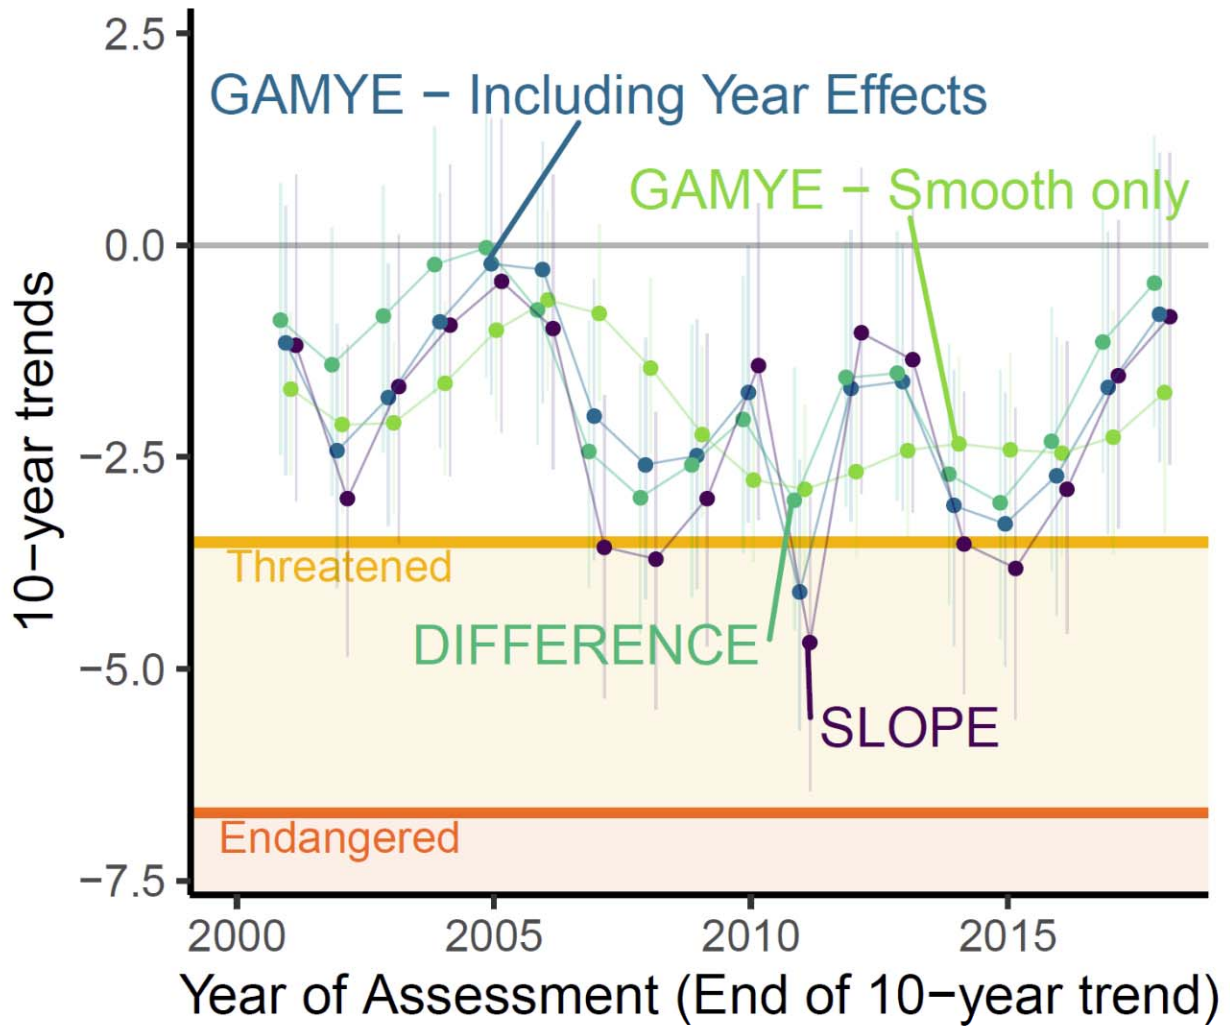

817

818 Figure 8. Sequential, short-term trend estimates for Wood Thrush (*Hylocichla mustelina*) in  
819 Canada from three alternative modeling approaches, and their comparison to the IUCN trend  
820 criteria for “Threatened” (in orange) and “Endangered” (in Red). Trends estimated from the  
821 decomposed trajectory of the GAMYE that include only the smooth component (in blue) are  
822 more stable between sequential years than trends from the other models that include annual  
823 fluctuations.

824



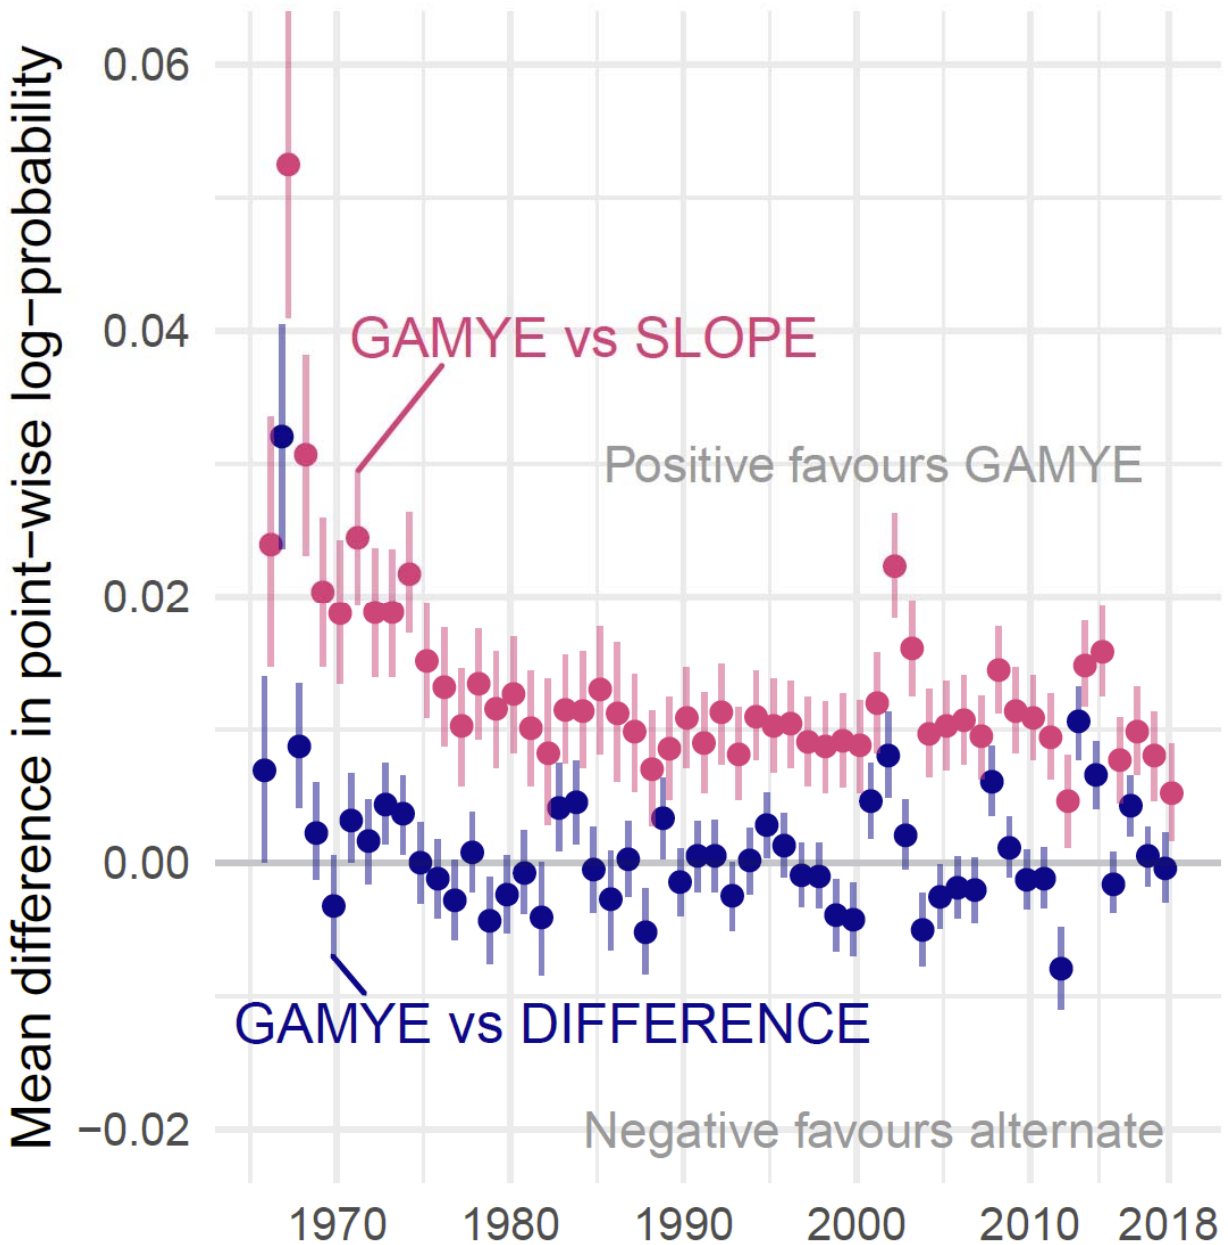

825

826 Figure 9. Annual differences in predictive fit between the GAMYE and SLOPE (blue) and the

827 GAMYE and DIFFERENCE model (red) for Barn Swallow.

828

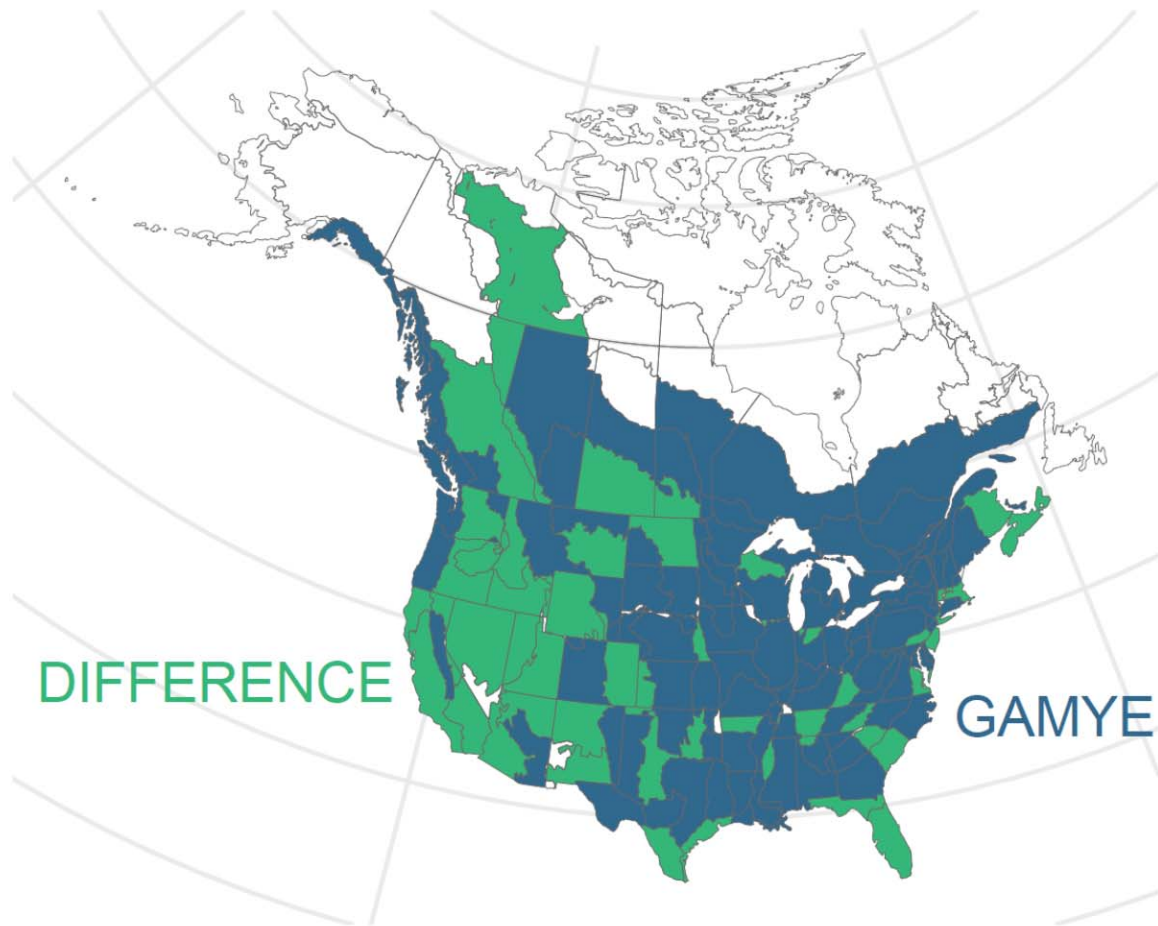

829

830 Figure 10. Geographic distribution of the preferred model for Barn Swallow, according to the  
831 point-estimate of the mean difference in predictive fit between GAMYE and DIFFERENCE. The  
832 GAMYE is generally preferred in the Eastern part of the species' range, but the DIFFERENCE is  
833 preferred in many regions in the Western part of the species' range. Note: in most regions, the  
834 differences in predictive fit were variable and neither model was clearly preferred (i.e., the 95%  
835 CI of the mean difference included 0).
